# Supplementary material for: Alkaline phosphatase (ALP) activatable small molecule-based prodrugs for cancer theranostics
Source: Royal Society of Chemistry journal article supplement (doi:10.1039/d3ob00510k), 2023-01-01
Supplement: d3ob00510k1.pdf [file d3ob00510k1.pdf]

Electronic Supplementary Information

**Alkaline Phosphatase (ALP) Activatable Small Molecule-based Prodrugs for  
Cancer Theranostics**

Kartikay Tyagi<sup>a</sup>, Reena Kumari<sup>a</sup> and V. Venkatesh<sup>\*a</sup>

<sup>a</sup> Laboratory of Chemical Biology and Medicinal Chemistry, Department of Chemistry, Indian  
Institute of Technology Roorkee, Uttarakhand-247667, India, E-mail:

venkatesh.v@cy.iitr.ac.in

| <b>Table of Contents</b>                                                                         | <b>Page No.</b> |
|--------------------------------------------------------------------------------------------------|-----------------|
| • General experimental details.....                                                              | 2               |
| • Synthetic route of proposed prodrugs.....                                                      | 3               |
| • Fluorescence emission spectra of generated fluorophore<br>and GSH depletion by DTNB assay..... | 4               |
| • HRMS spectrum of <i>p</i> -naphthoquinone methide and GSH adduct.....                          | 5               |
| • Cellular images of generated turn-on fluorophore.....                                          | 6               |
| • <sup>1</sup> H, <sup>13</sup> C, <sup>31</sup> P, <sup>19</sup> F NMR and HRMS spectra.....    | 7-36            |

**General Experimental Details:** All solvents and reagents were used, as received from the suppliers. TLC was performed on Merck Kiesel gel 60, F<sub>254</sub> plates with the layer thickness of 0.25 mm. Column chromatography was performed on silica gel (100-200 mesh) using a gradient of ethyl acetate and hexane as mobile phase. <sup>1</sup>H NMR spectral data were collected at, 500 MHz (JEOL), <sup>13</sup>C NMR were recorded at 125 MHz, <sup>31</sup>P NMR were recorded at 202 MHz, and <sup>19</sup>F NMR spectra were recorded at 471 MHz. <sup>1</sup>H NMR spectral data are given as chemical shifts in ppm followed by multiplicity (s- singlet; d- doublet; t- triplet; q- quartet; m- multiplet), number of protons and coupling constants. <sup>13</sup>C NMR, <sup>31</sup>P NMR, and <sup>19</sup>F NMR chemical shifts are expressed in ppm. Fluorescence spectra was recorded using Horiba Fluoromax. Results obtained from MTT assay, GSH depletion assay, and DCFH-DA assays were recorded by Biotek synergy H1 plate reader. All the biological analysis were completed using GraphPad Prism software.

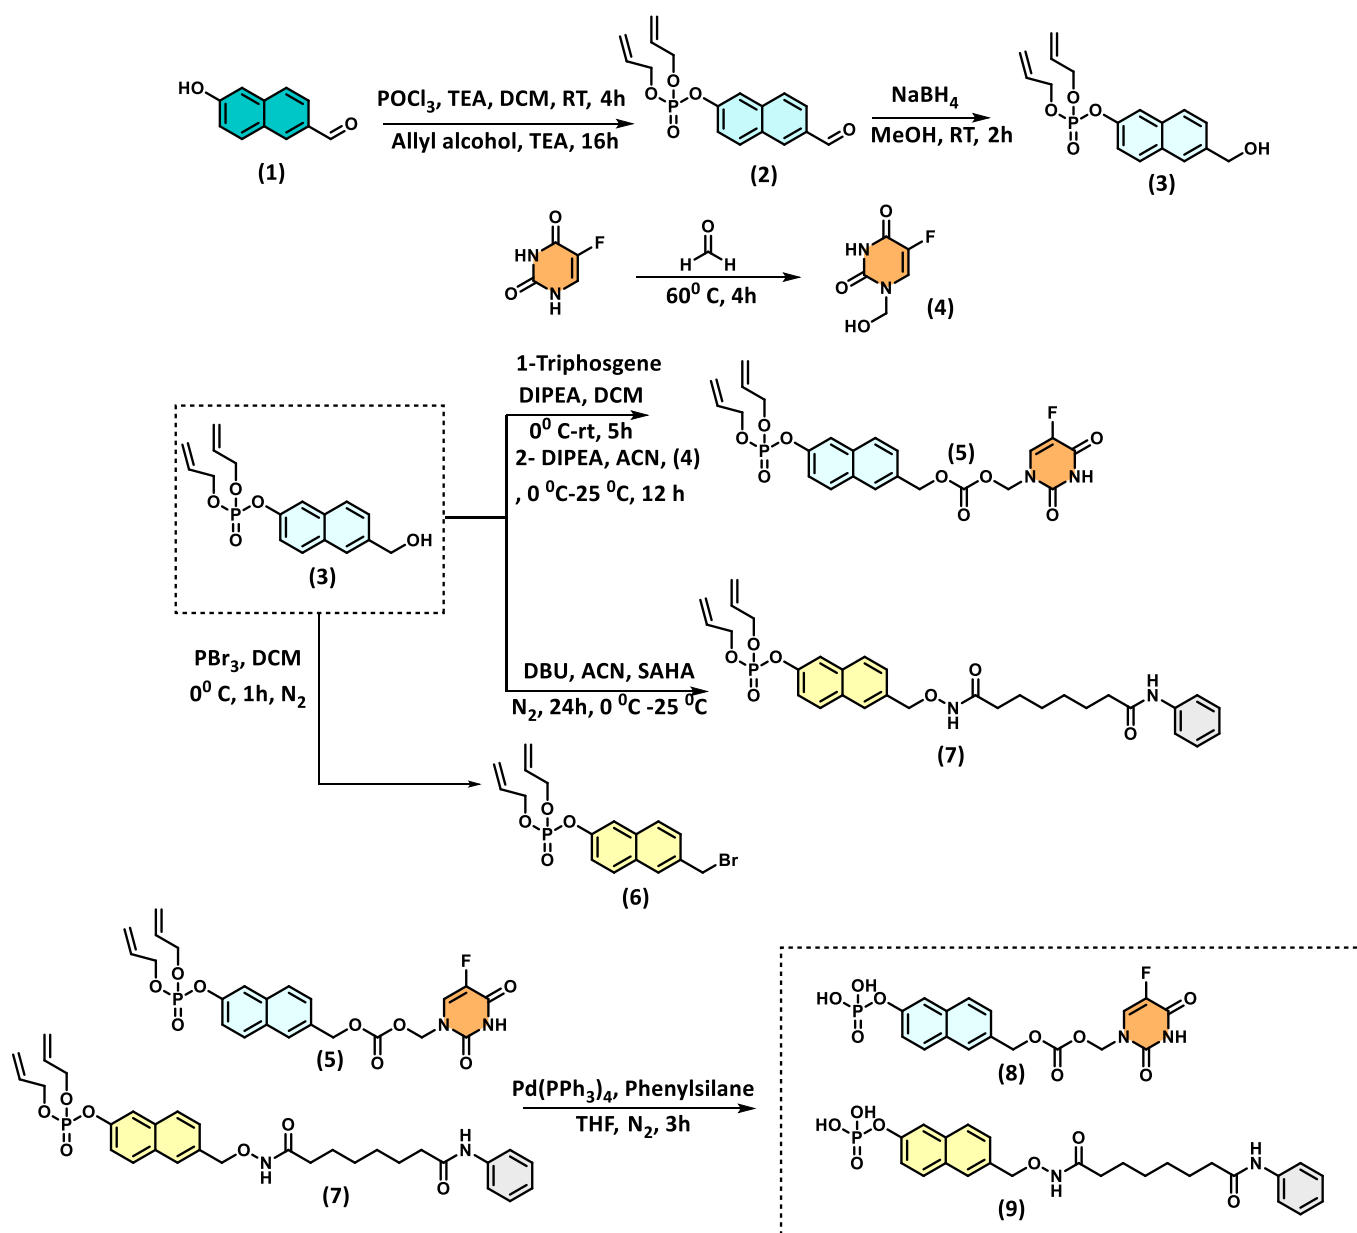

**Fig. S1** Stepwise synthetic route for prodrug synthesis

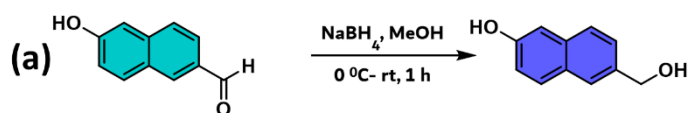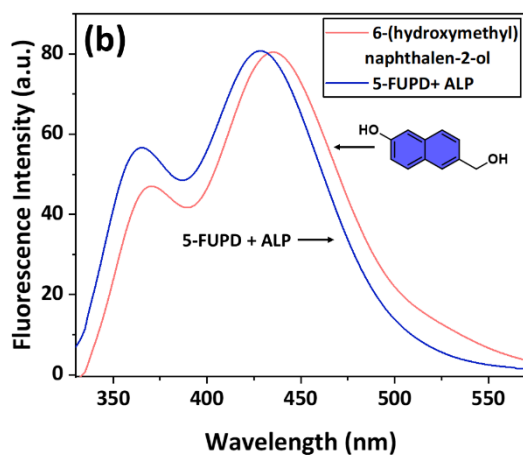

**Fig. S2:** (a) Reduction of 6-hydroxy-2-naphthaldehyde into of 6-(hydroxymethyl)naphthalen-2-ol; (b) Fluorescence spectrum of 6-(hydroxymethyl)naphthalen-2-ol and fluorophore generated from ALP triggered hydrolysis of 5-FUPD.

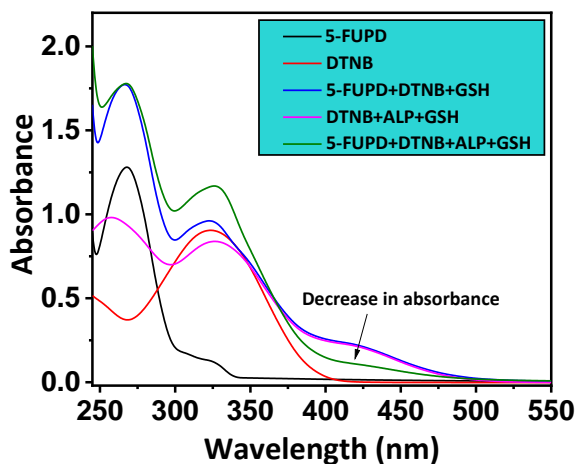

**Fig. S3:** Assessment of GSH depletion by treatment with prodrugs using DTNB assay. GSH, prodrug, and ALP solutions were incubated at 37 °C for 20 minutes and DTNB reagent was added. Depletion in GSH levels was observed by taking absorption spectrum using UV-Vis. spectrophotometer.

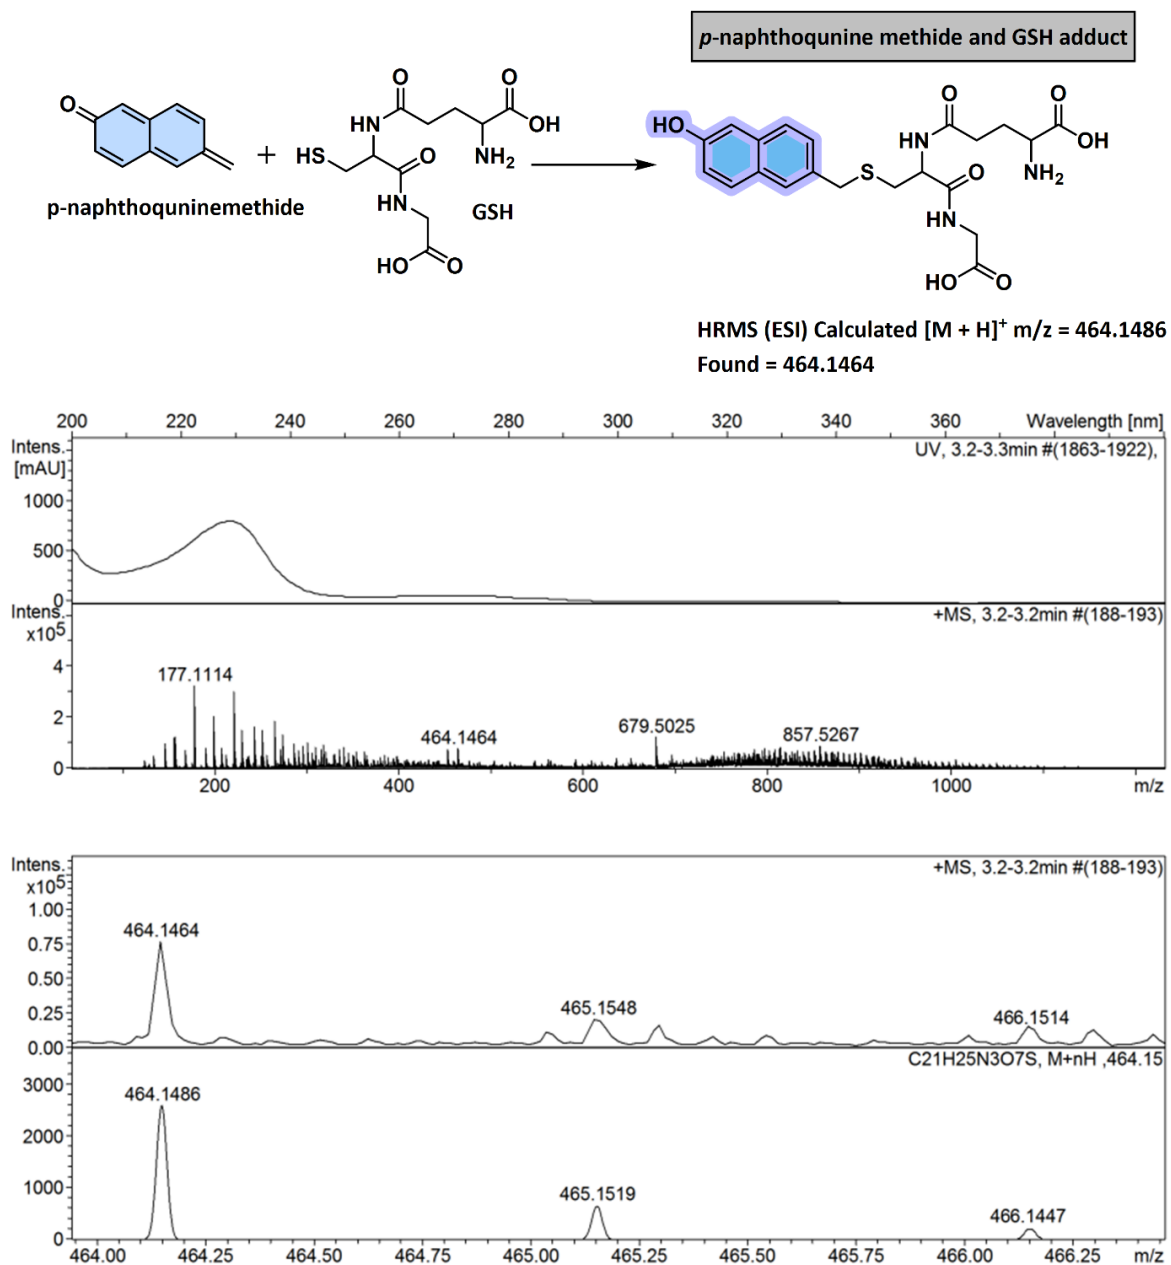

**Fig. S4:** HRMS spectrum of captured *p*-naphthoquinone methide and GSH adduct.

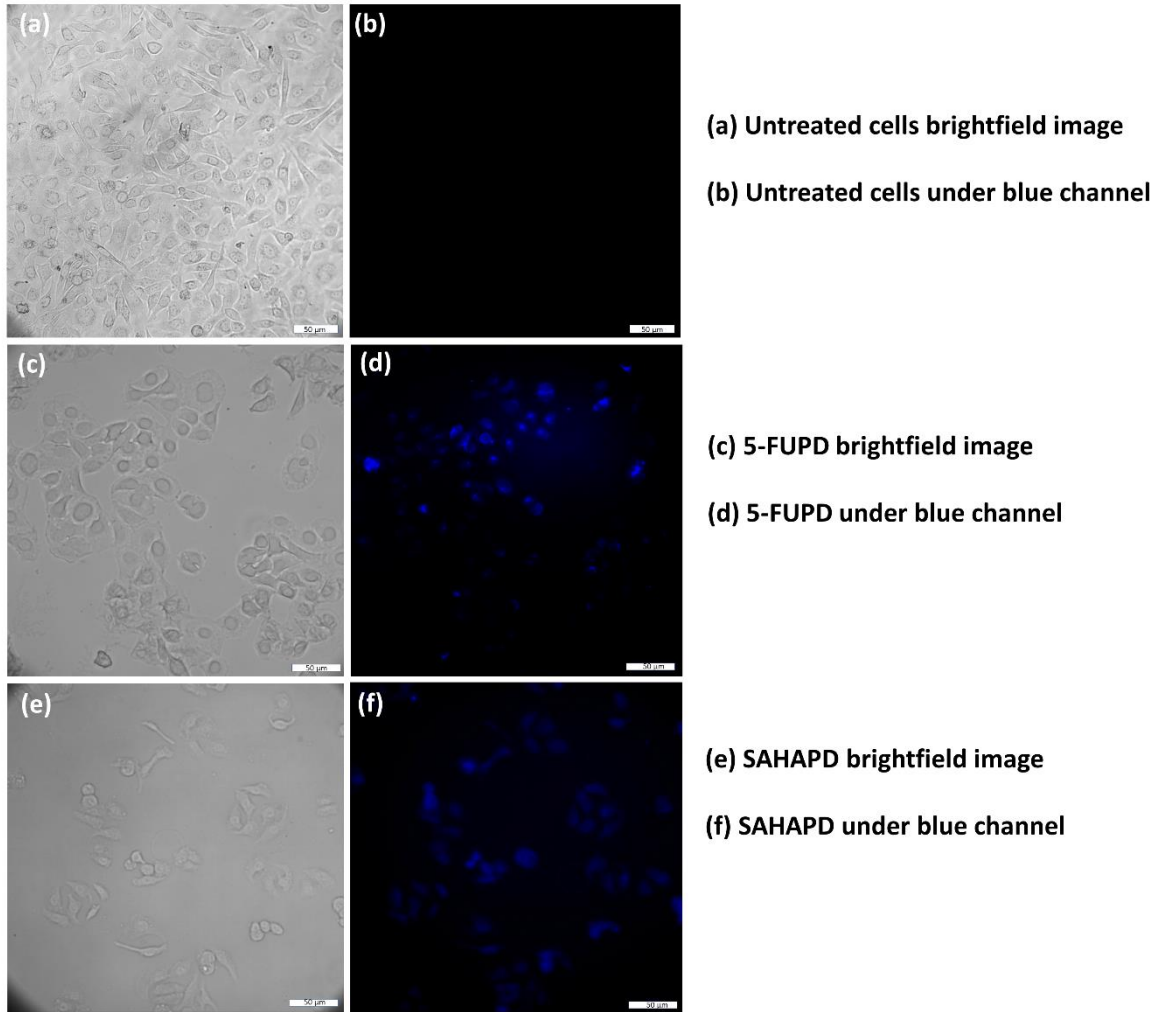

**Fig. S5:** Fluorescence images (a, b) untreated cells brightfield image and untreated cells under blue channel; (c, d) brightfield and fluorescence images of 5-FUPD under blue channel; (e, f) brightfield and fluorescence images of SAHAPD under blue channel.

<sup>1</sup>H NMR of compound 2 (CDCl<sub>3</sub>)

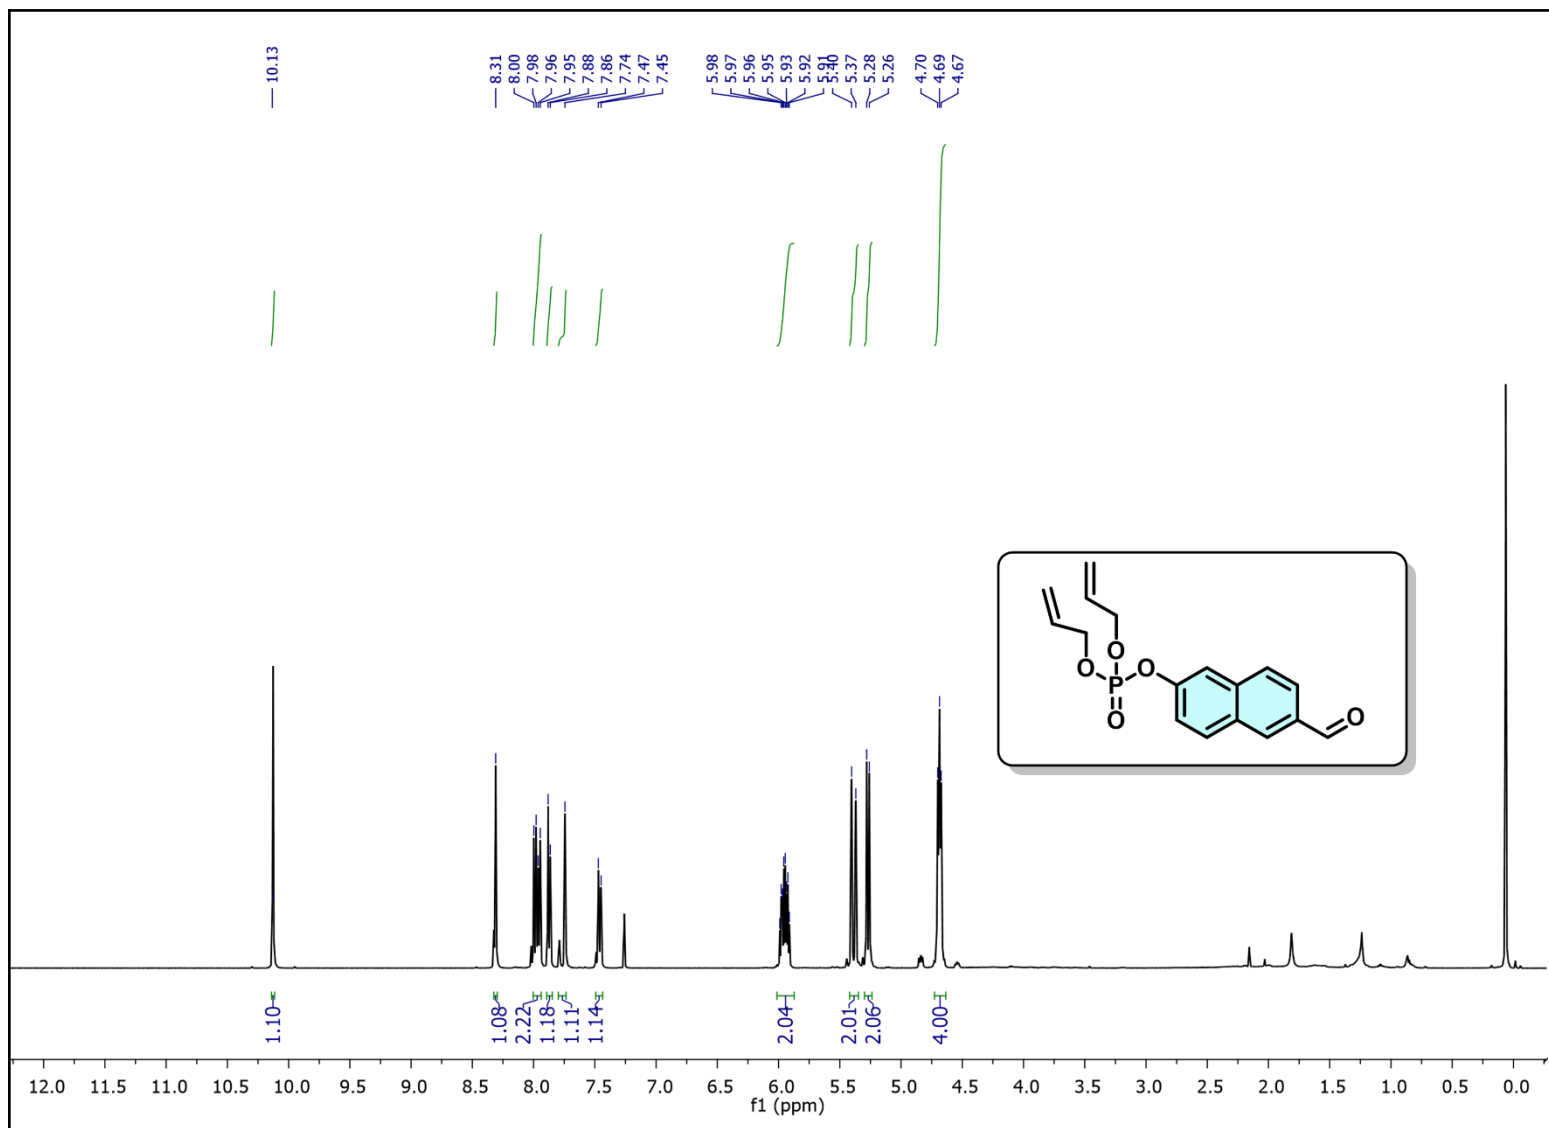

**$^{13}\text{C}$  NMR of compound 2 ( $\text{CDCl}_3$ )**

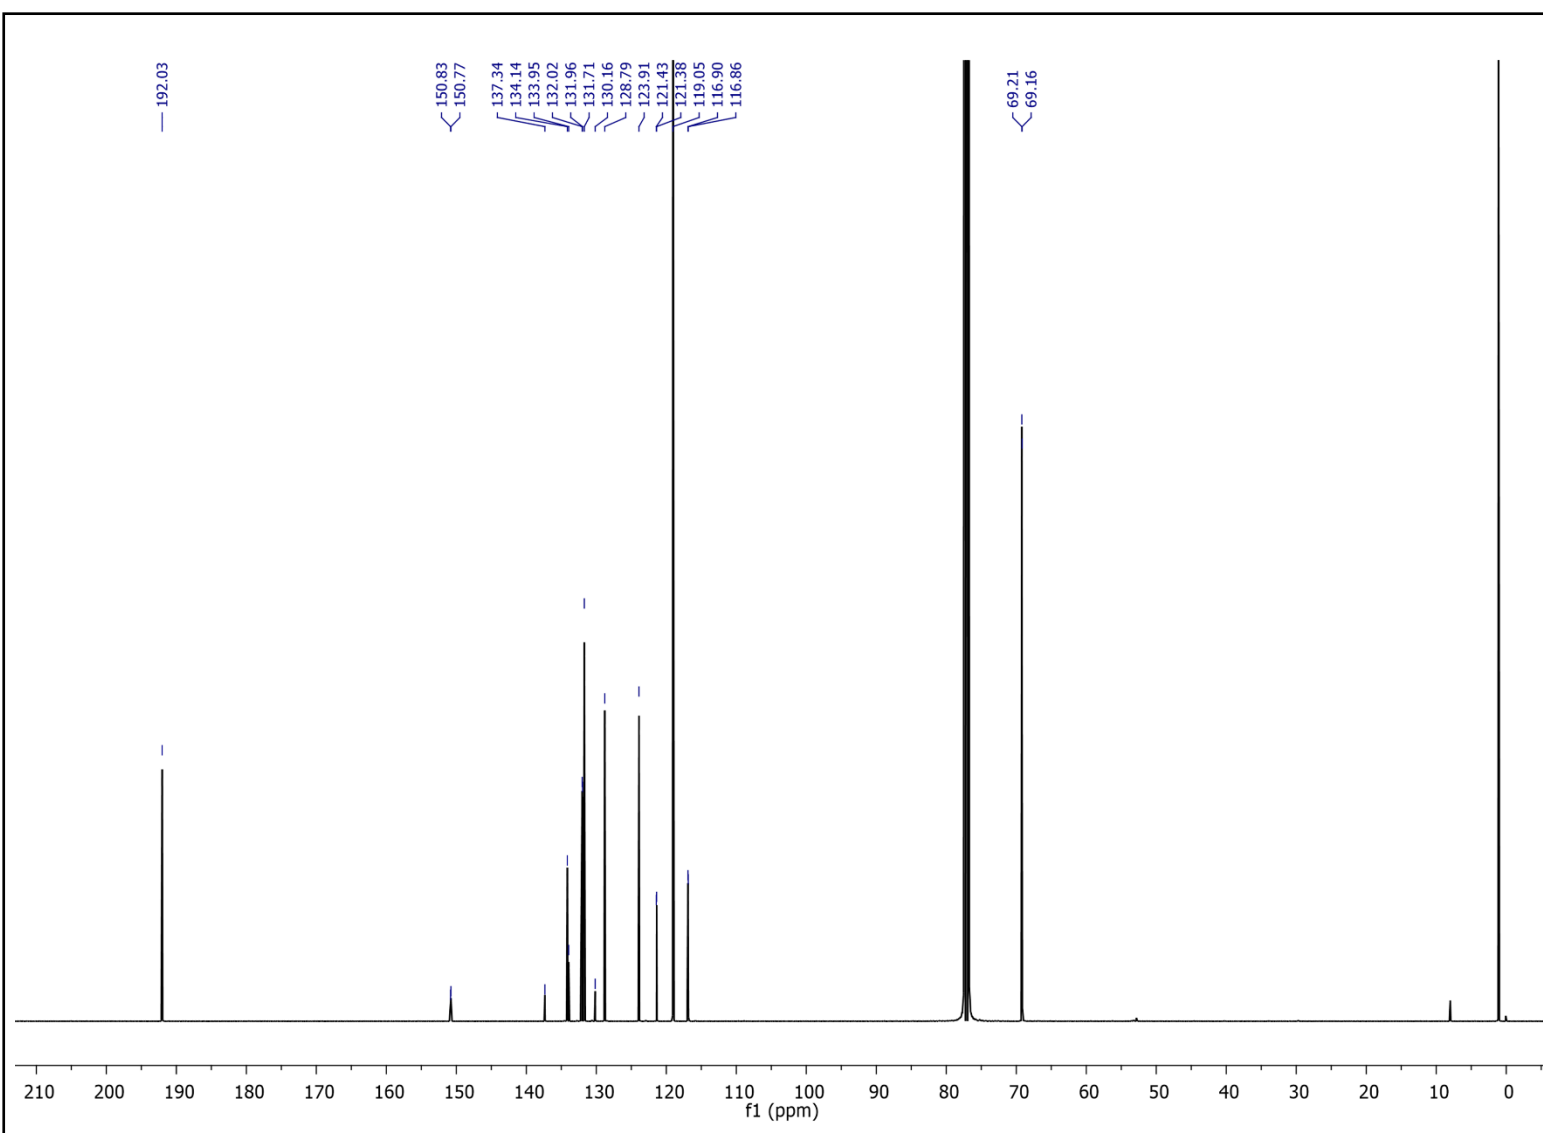



**<sup>31</sup>P NMR of compound 2 (CDCl<sub>3</sub>)**

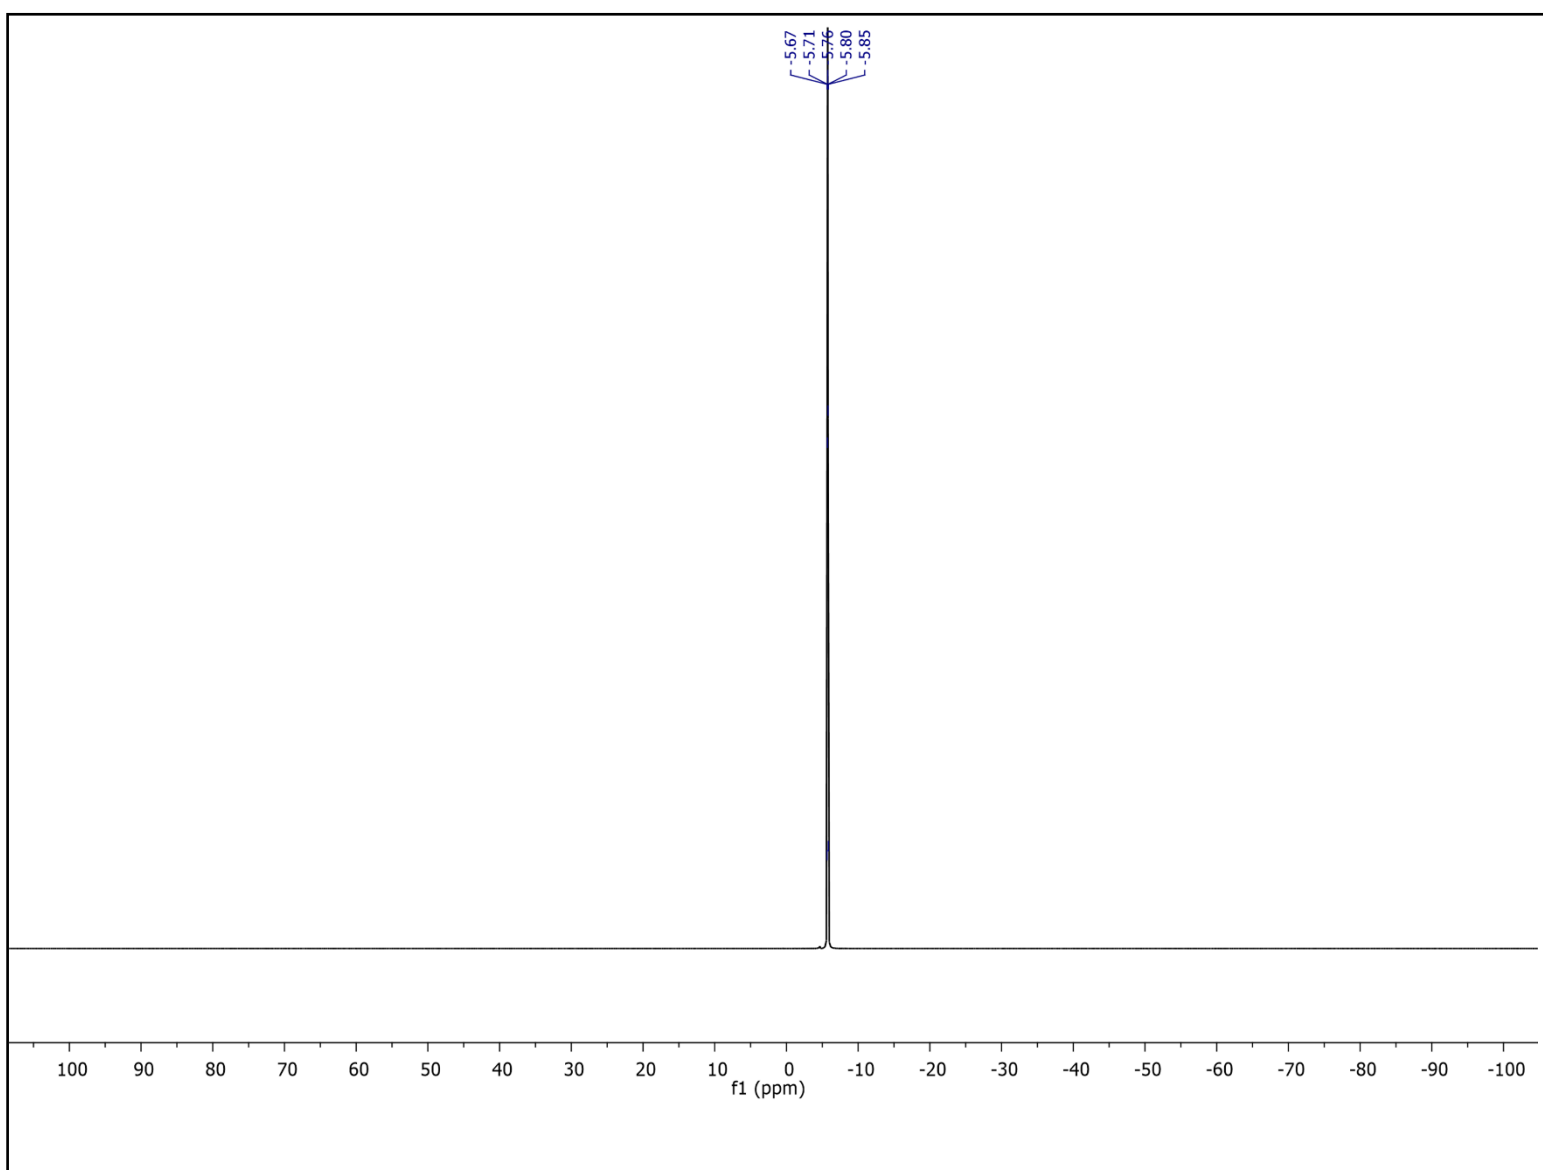

## HRMS of compound 2

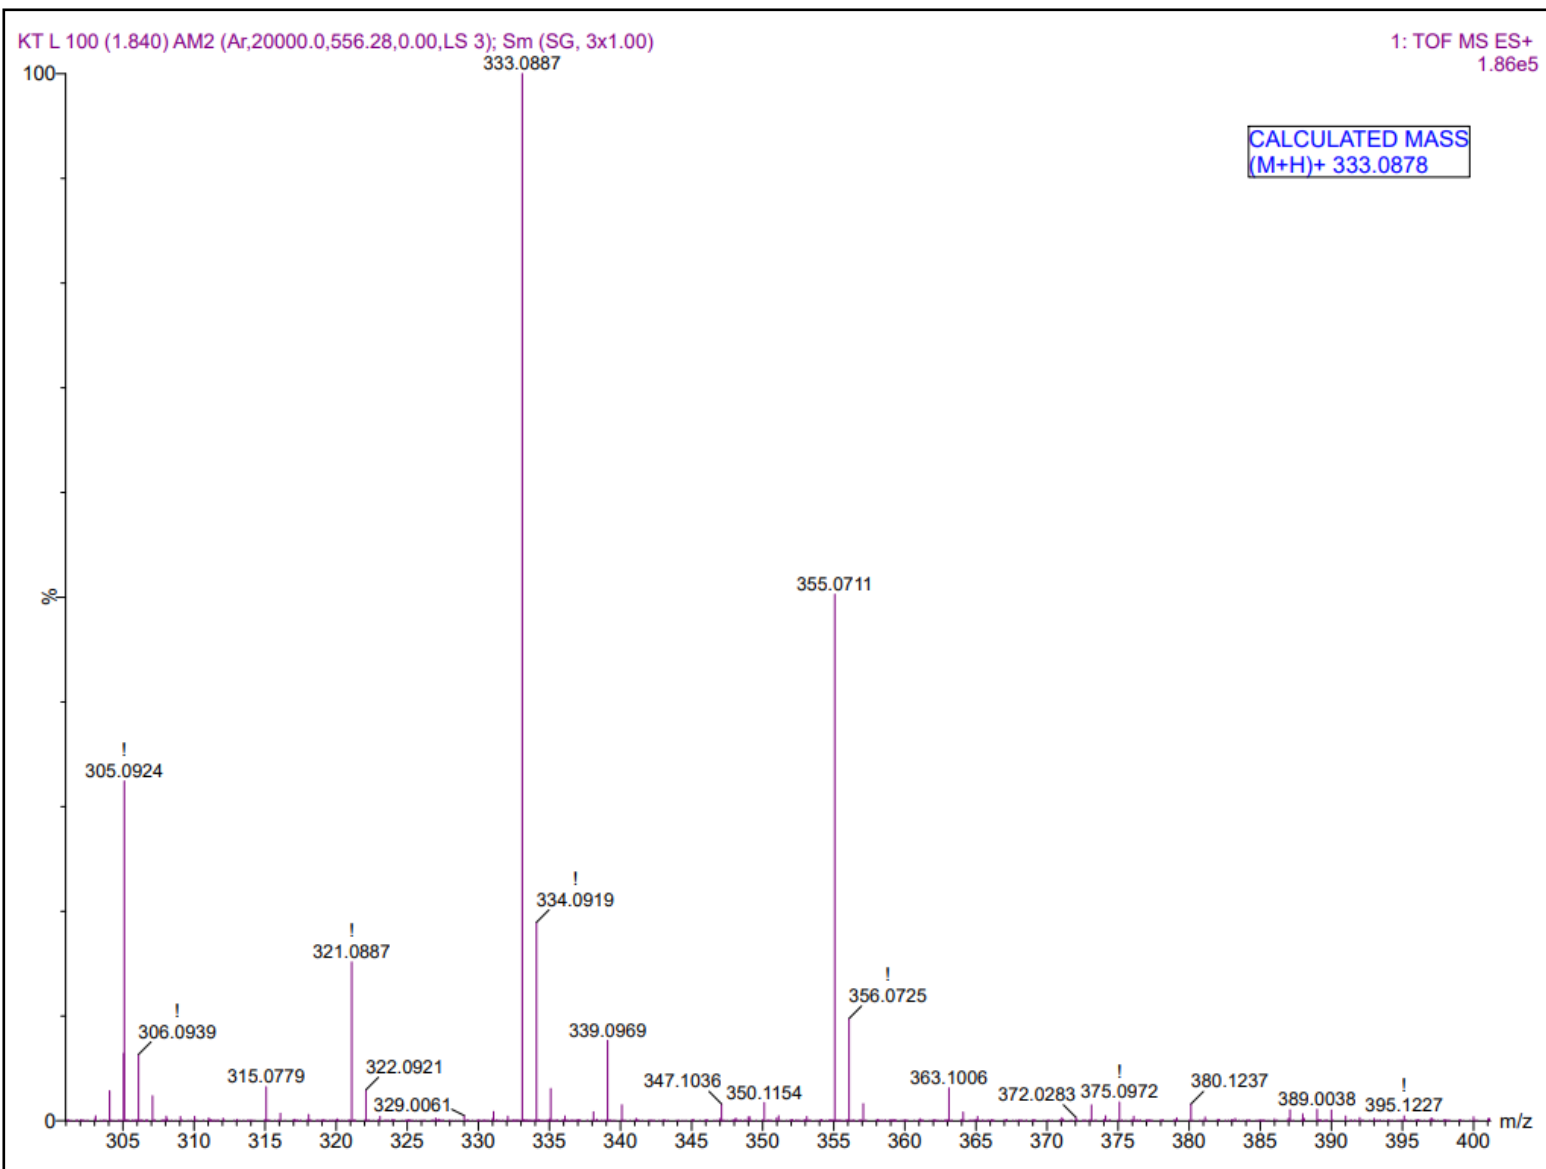

<sup>1</sup>H NMR of compound 3 (CDCl<sub>3</sub>)

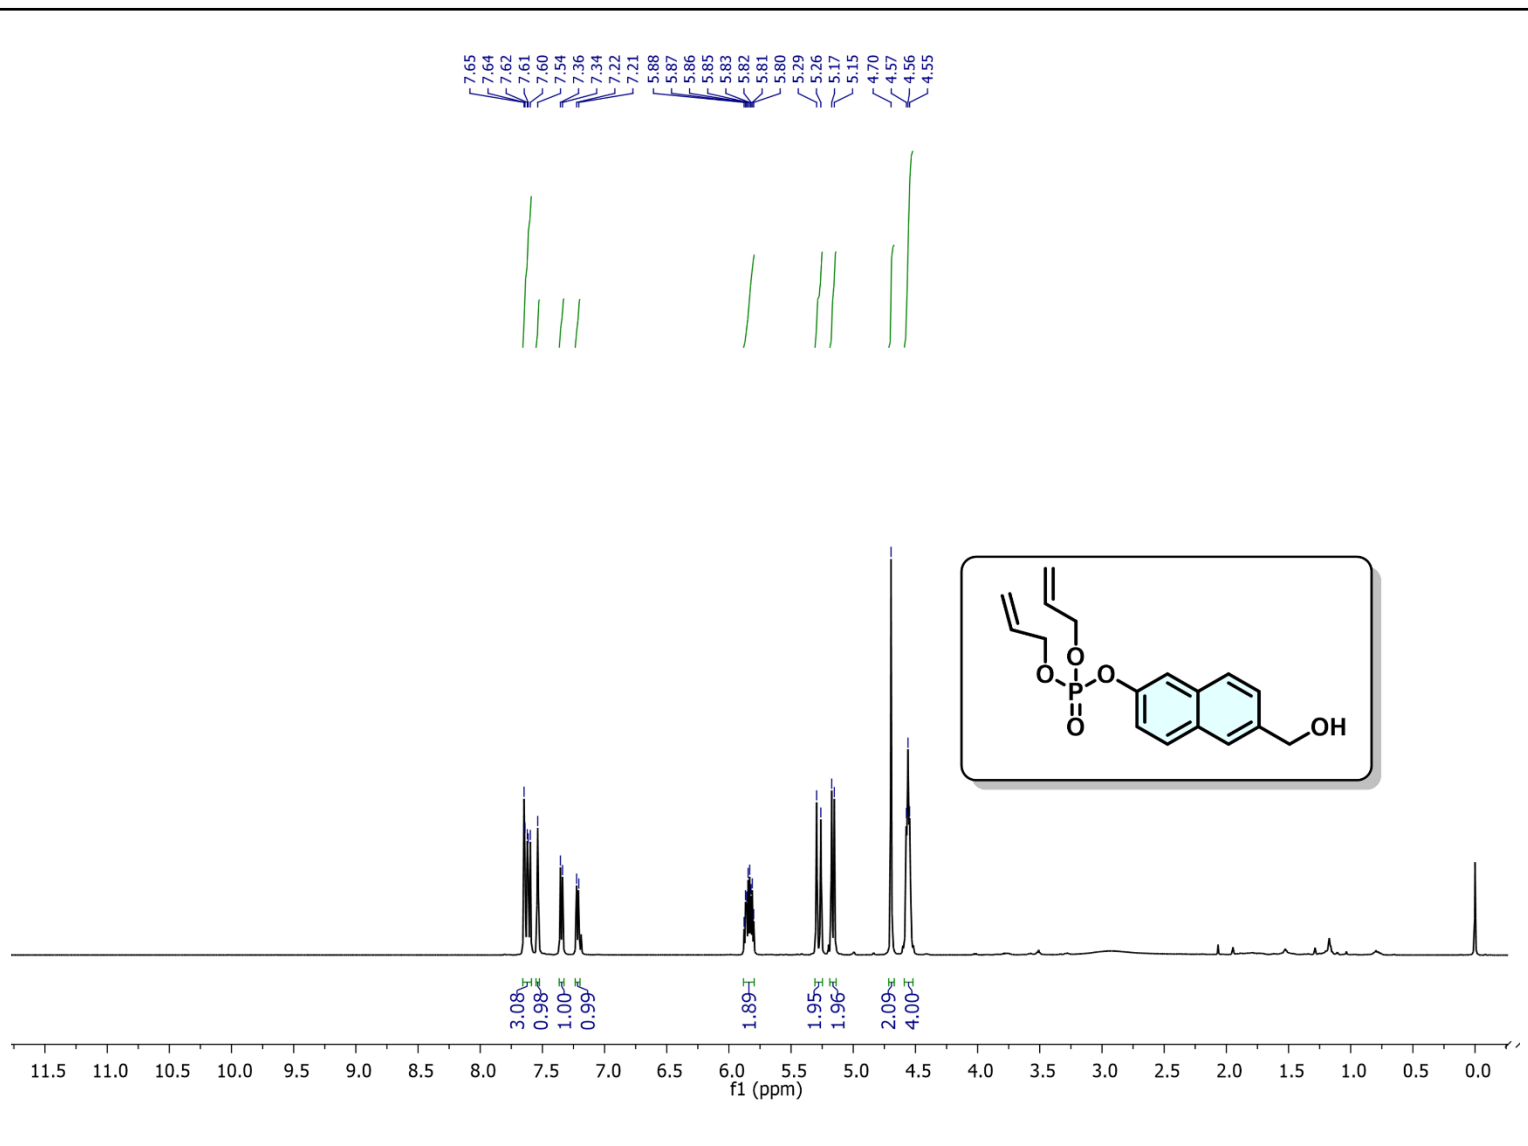

S10

**$^{13}\text{C}$  NMR of compound 3 ( $\text{CDCl}_3$ )**

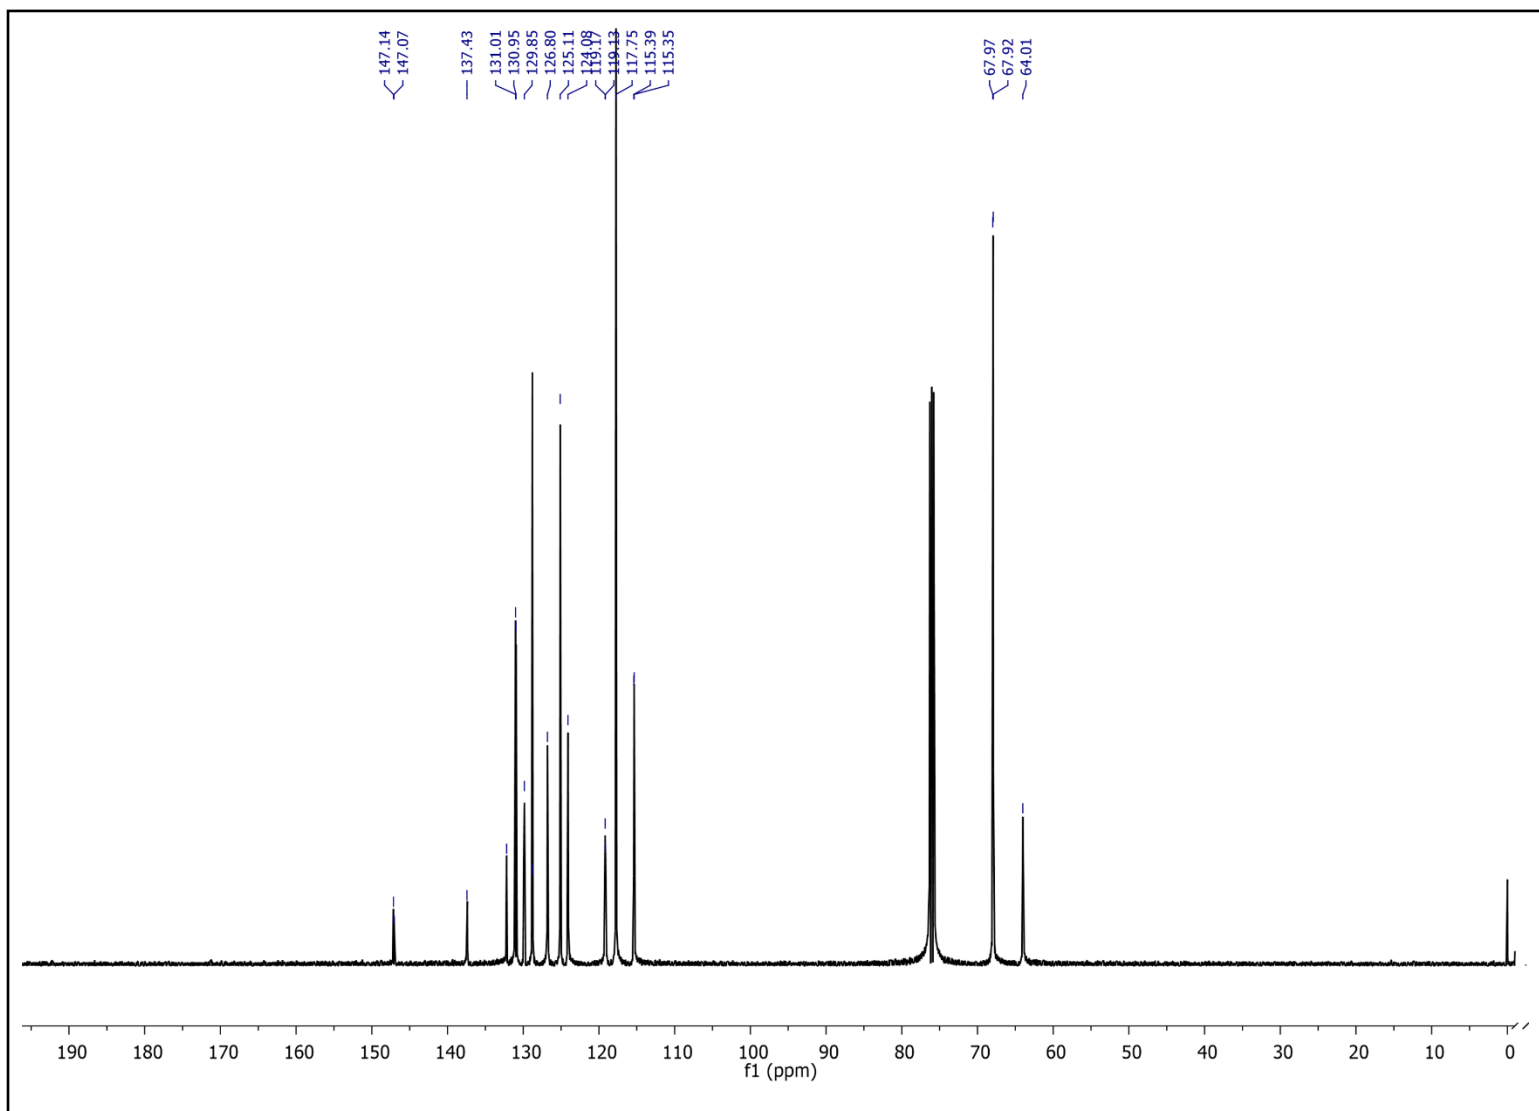

**S11**

**$^{31}\text{P}$  NMR of compound 3 ( $\text{CDCl}_3$ )**

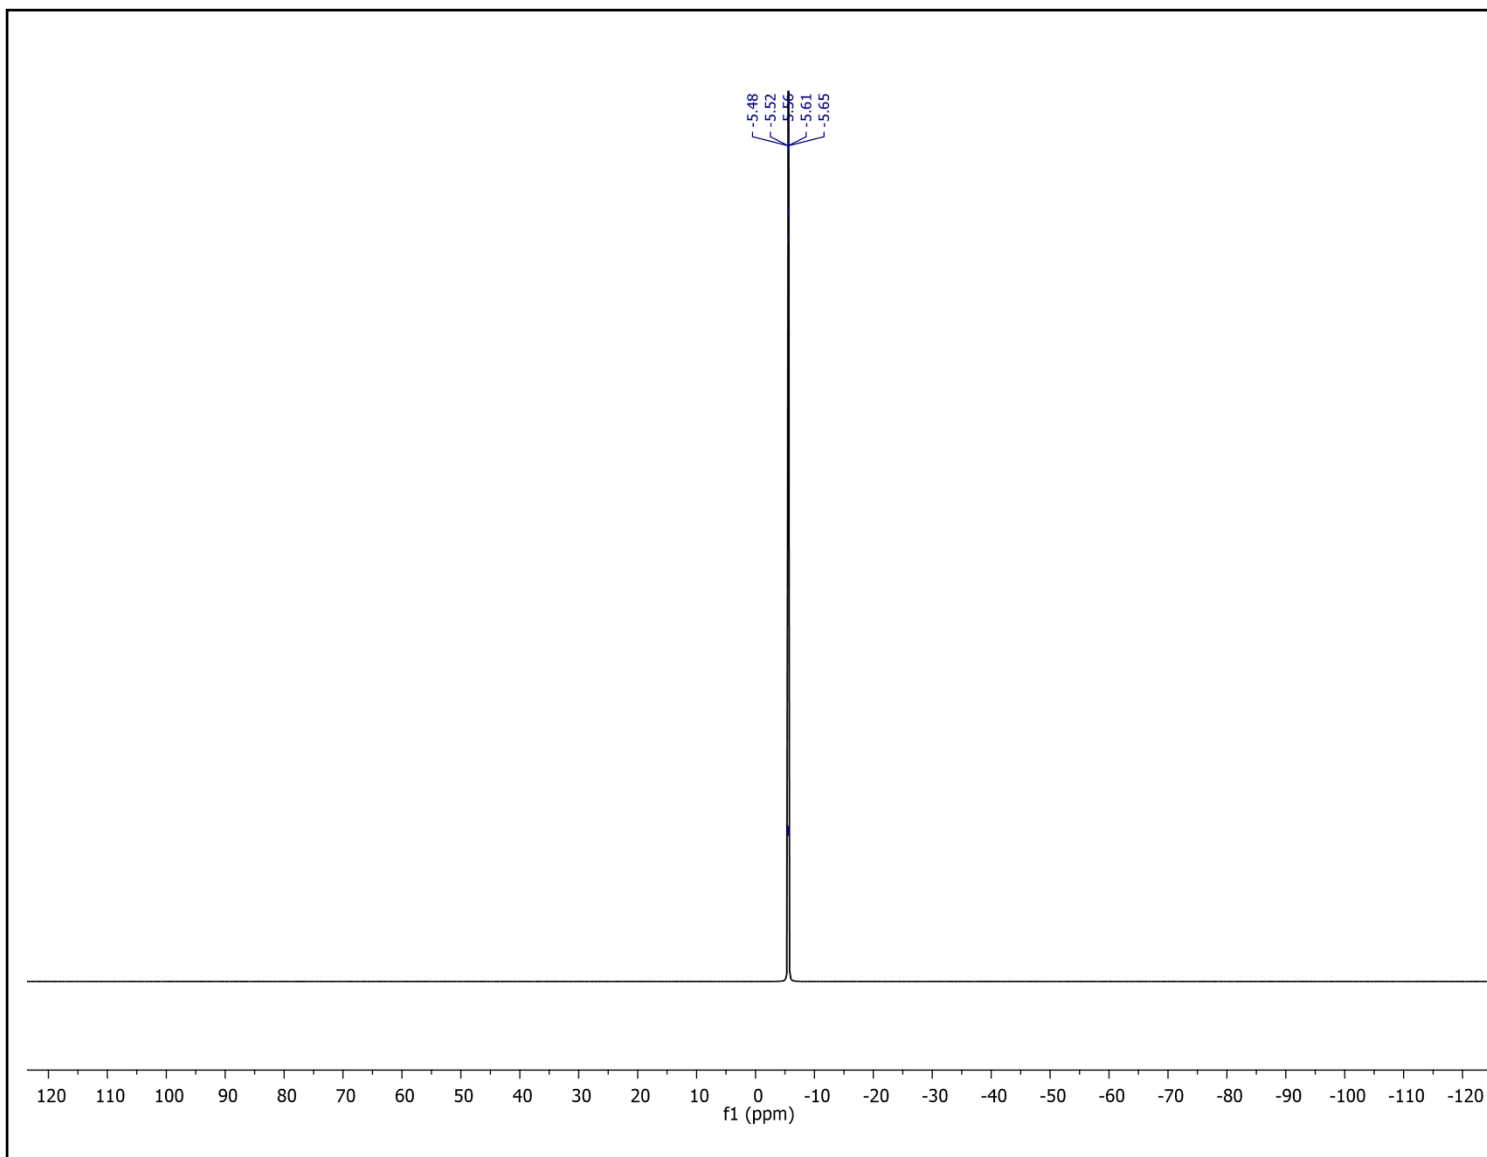

**S12**

### HRMS of compound 3

KT-2 #398 RT: 1.80 AV: 1 NL: 1.37E8  
T: FTMS + p ESI Full ms [100.0000-1500.0000]

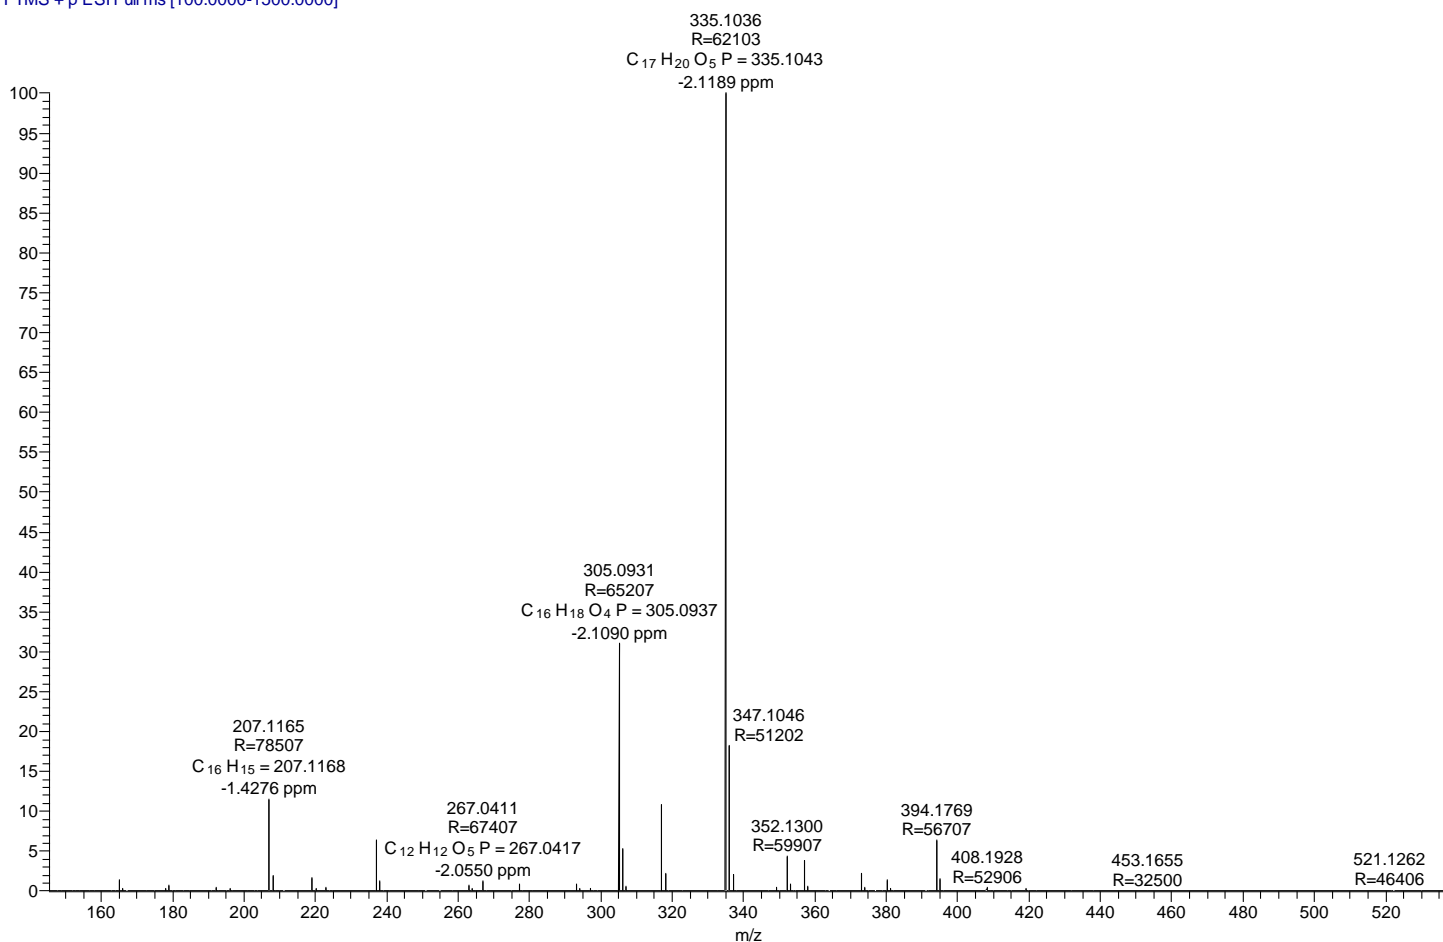

S13

<sup>1</sup>H NMR of compound 5 (CDCl<sub>3</sub>)

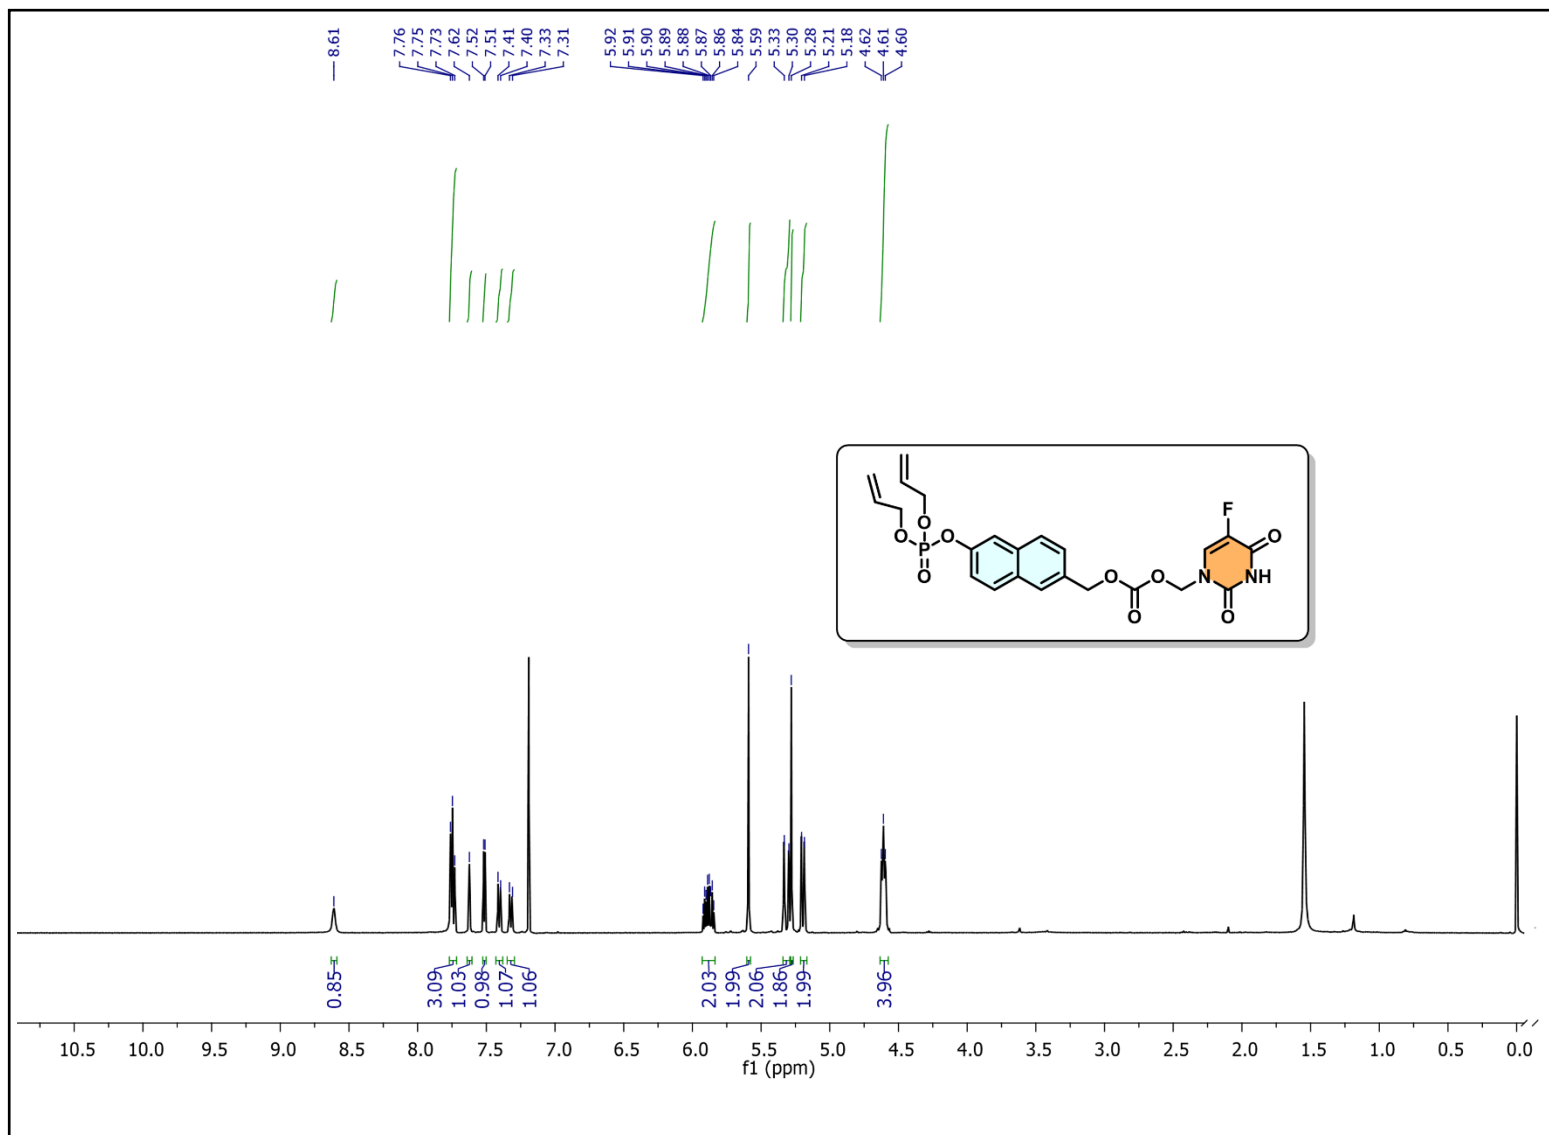

S14

<sup>13</sup>C NMR of compound 5 (CDCl<sub>3</sub>)

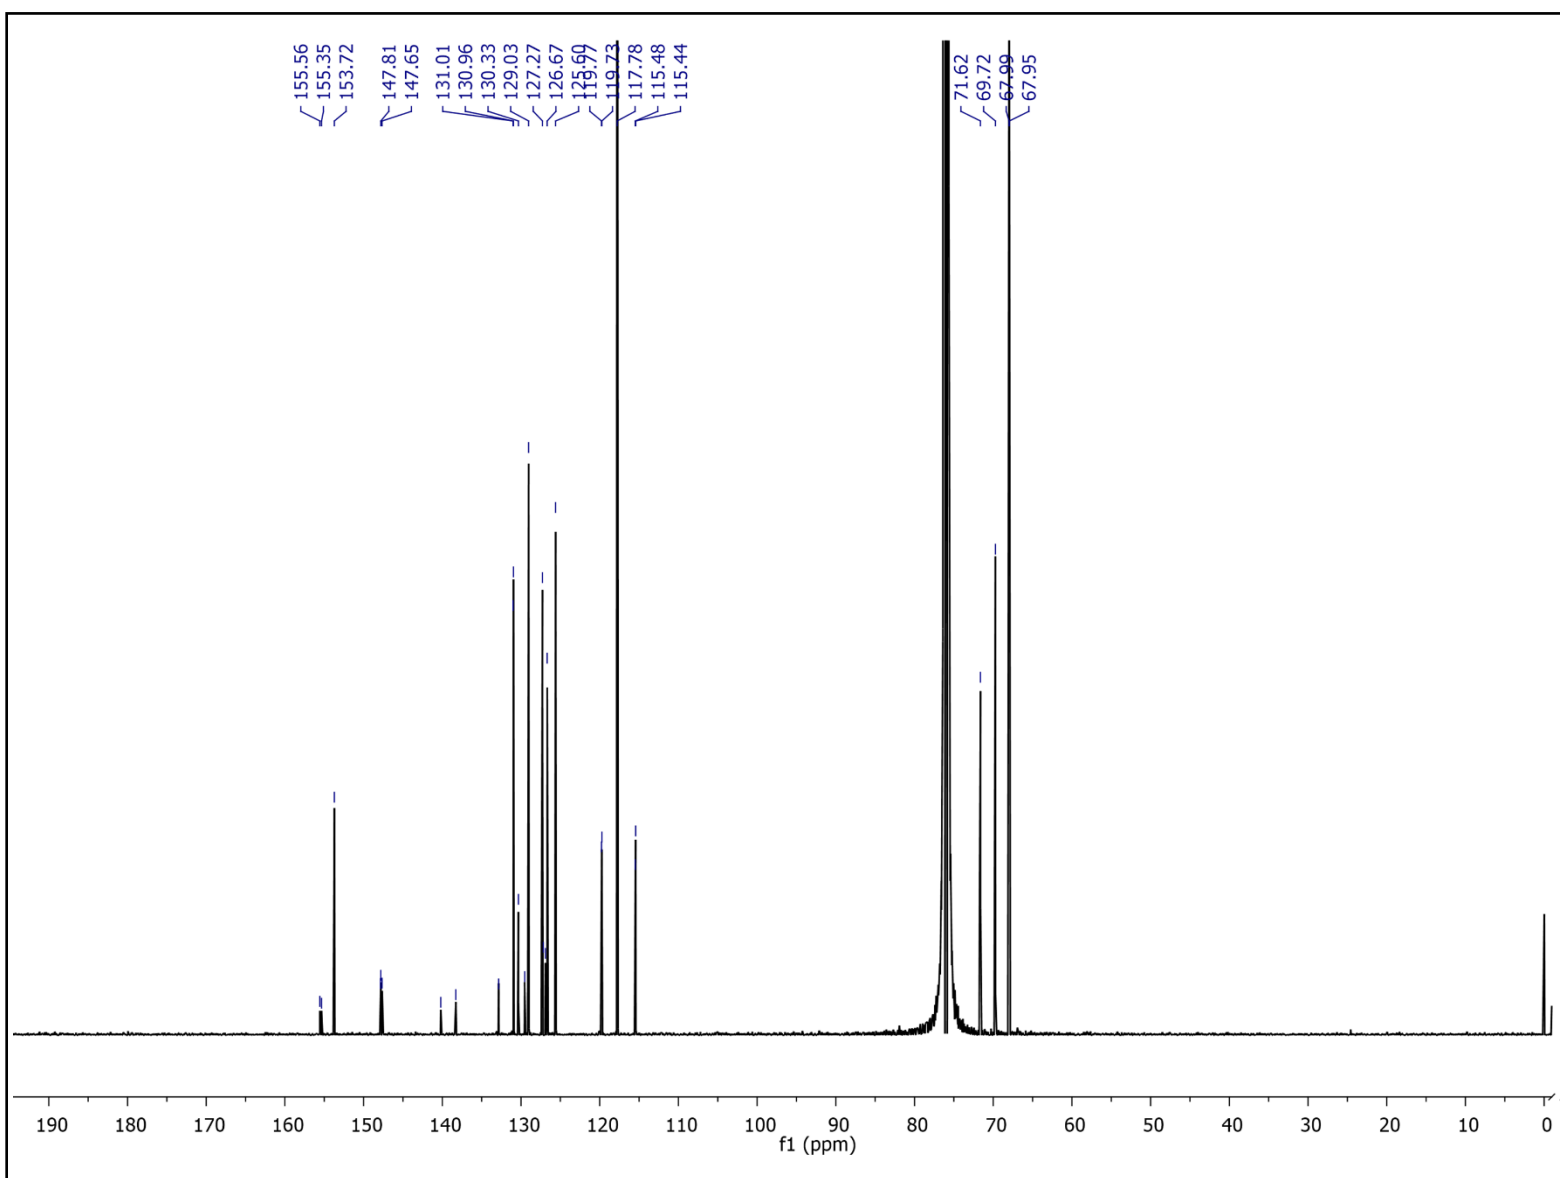

S15



**$^{31}\text{P}$  NMR of compound 5 ( $\text{CDCl}_3$ )**

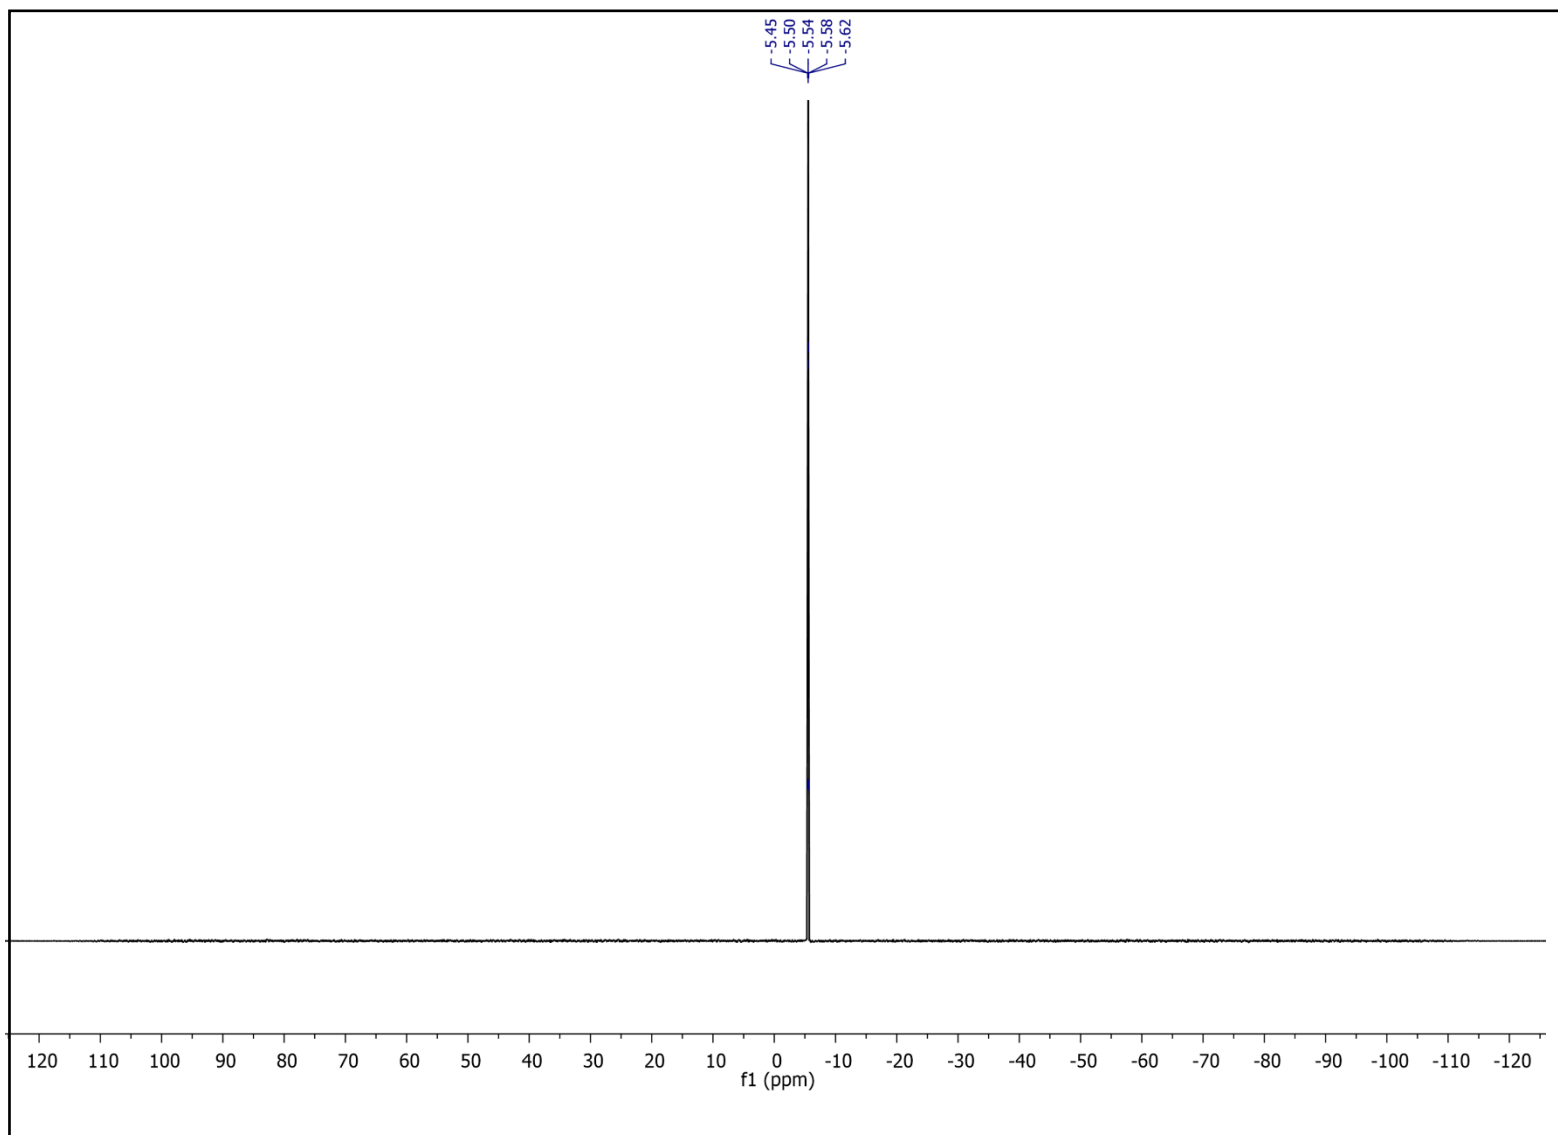

**S16**

**$^{19}\text{F}$  NMR of compound 5 ( $\text{CDCl}_3$ )**

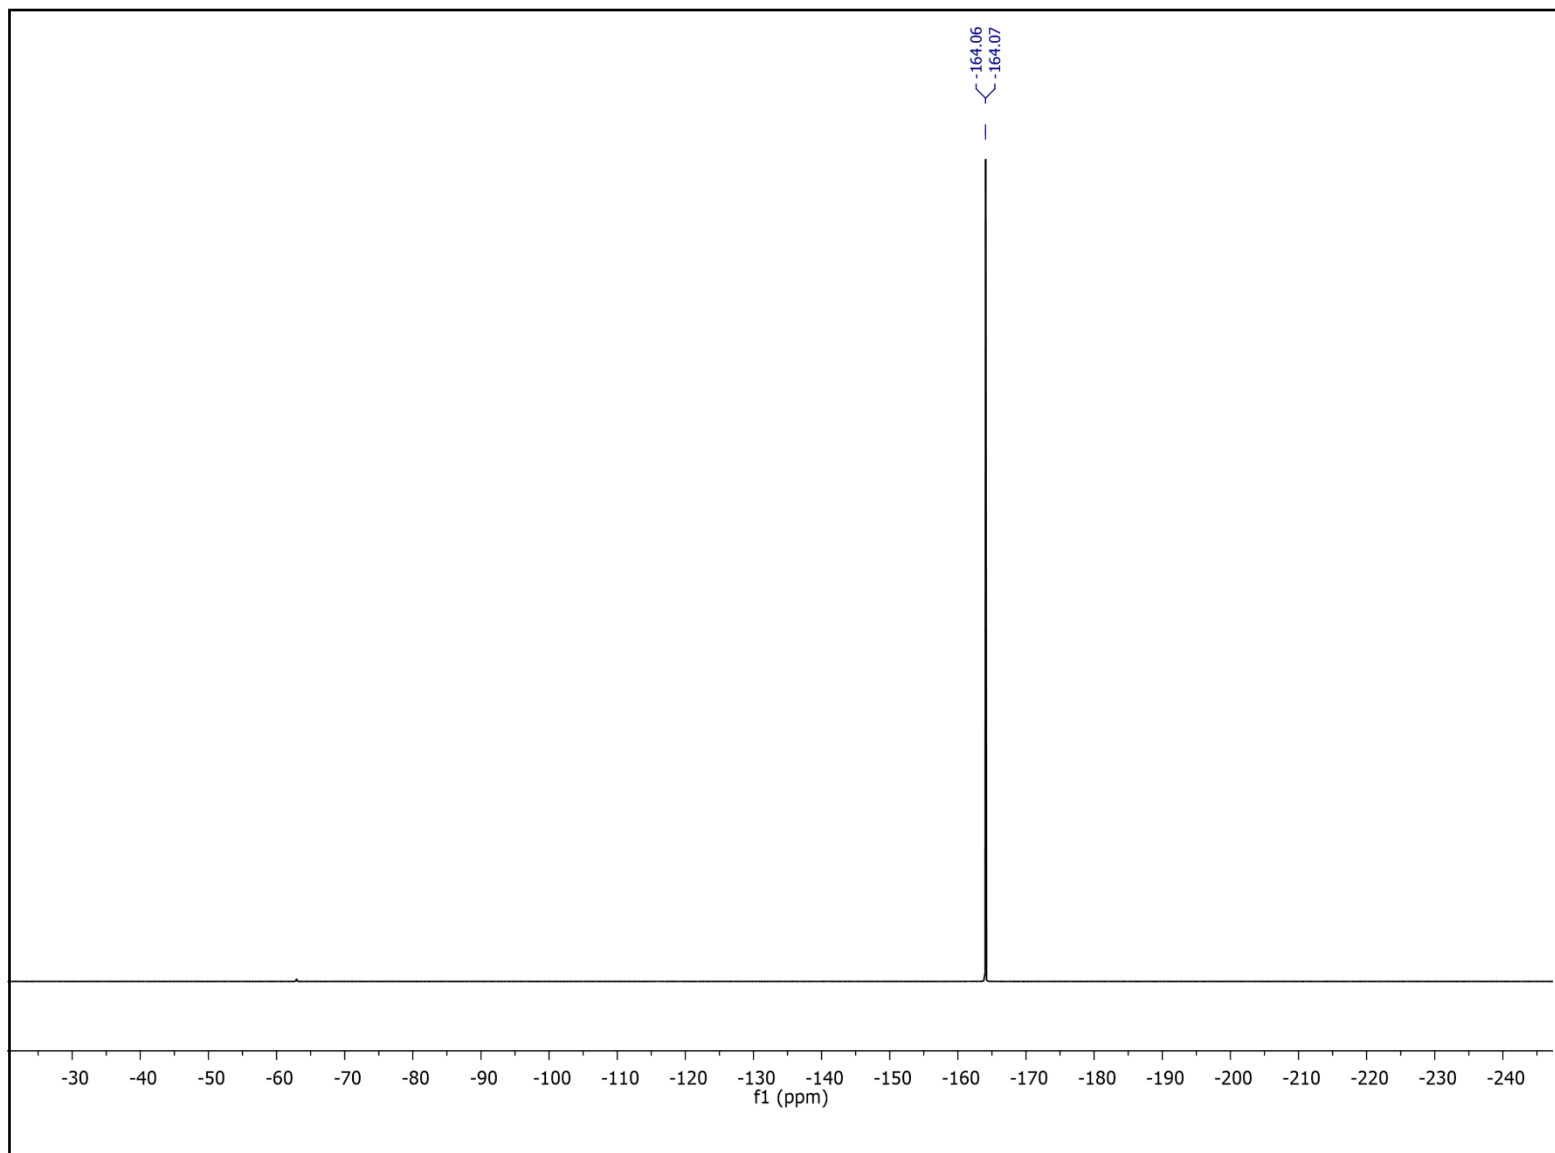

**S17**

## HRMS of compound 5

KT-431 #359 RT: 1.62 AV: 1 NL: 5.73E7  
T: FTMS + p ESI Full ms [100.0000-1500.0000]

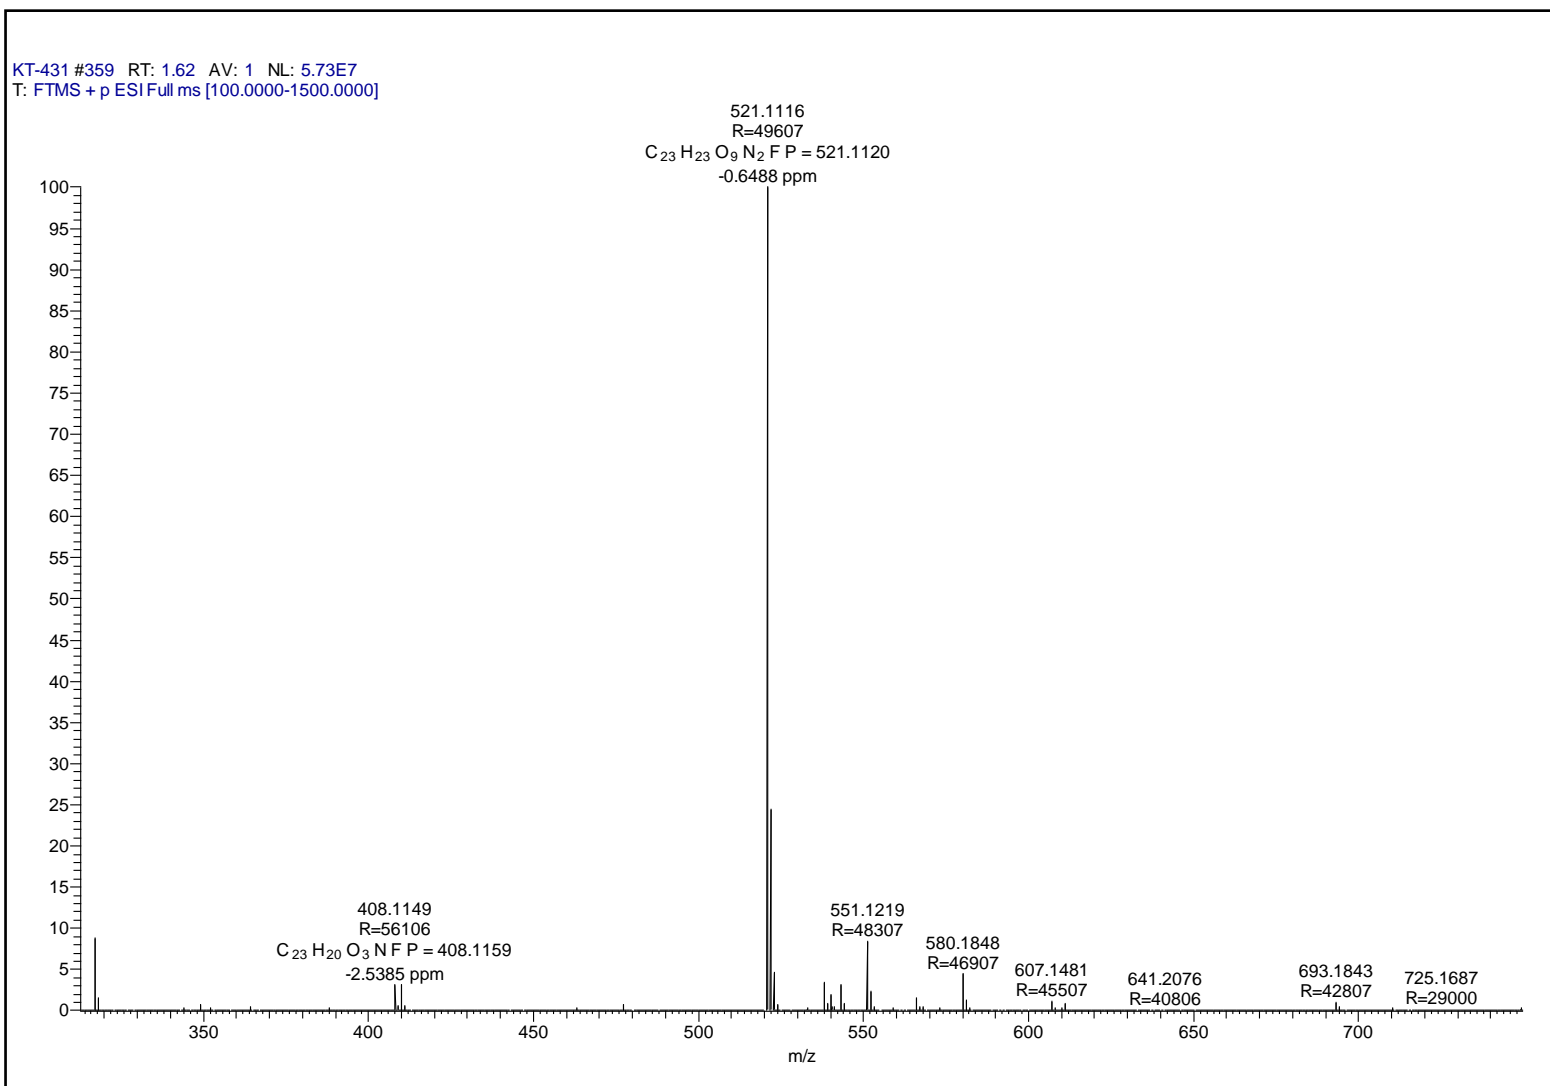

S18

<sup>1</sup>H NMR of compound 6 (CDCl<sub>3</sub>)

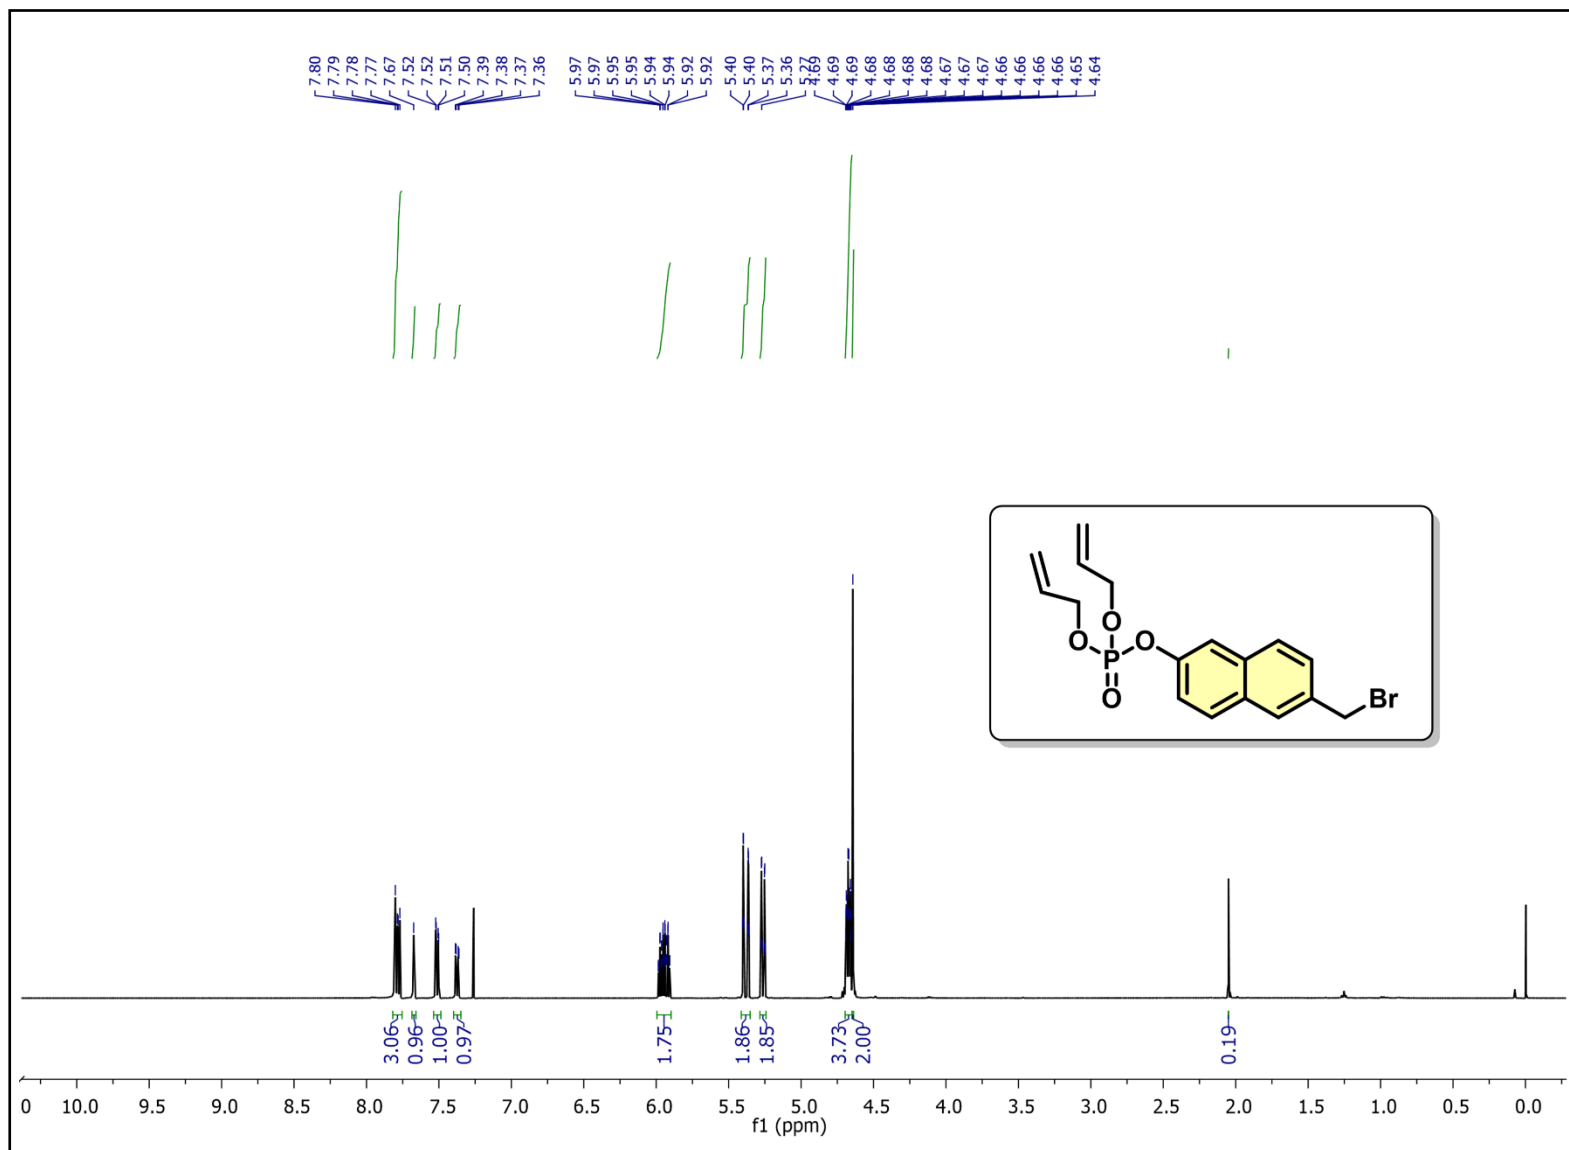

S19

**$^{13}\text{C}$  NMR of compound 6 ( $\text{CDCl}_3$ )**

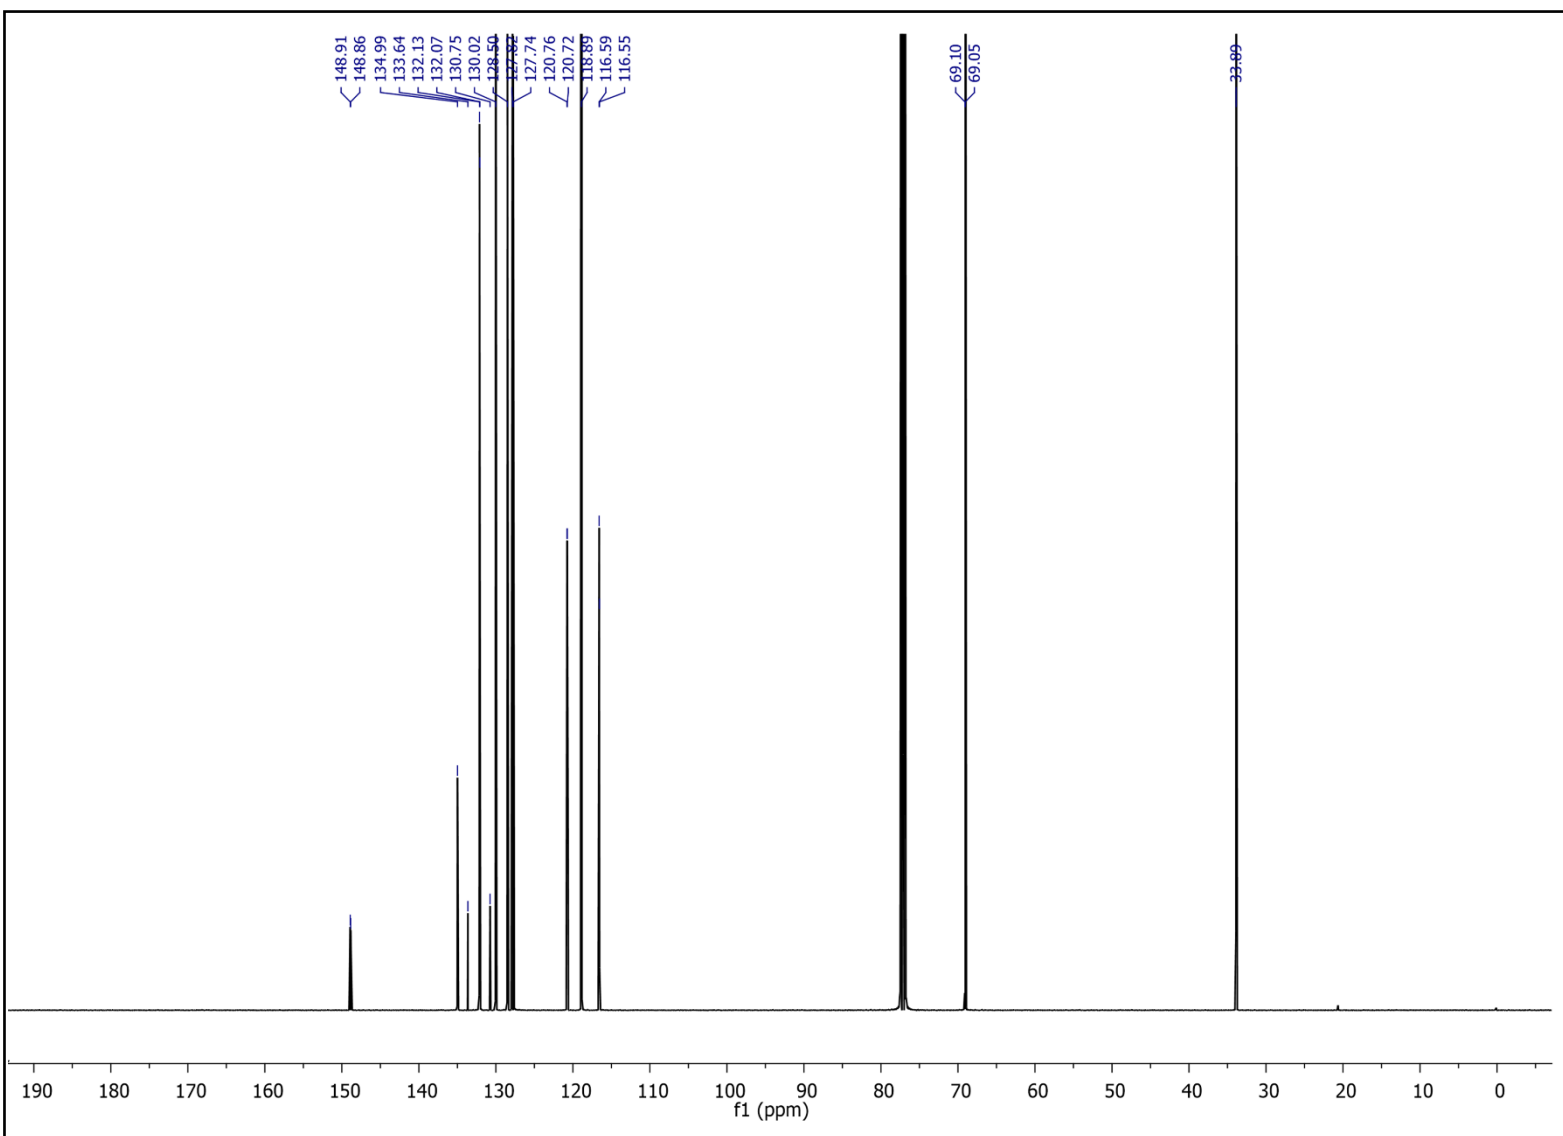

**S20**

**$^{31}\text{P}$  NMR of compound 6 ( $\text{CDCl}_3$ )**

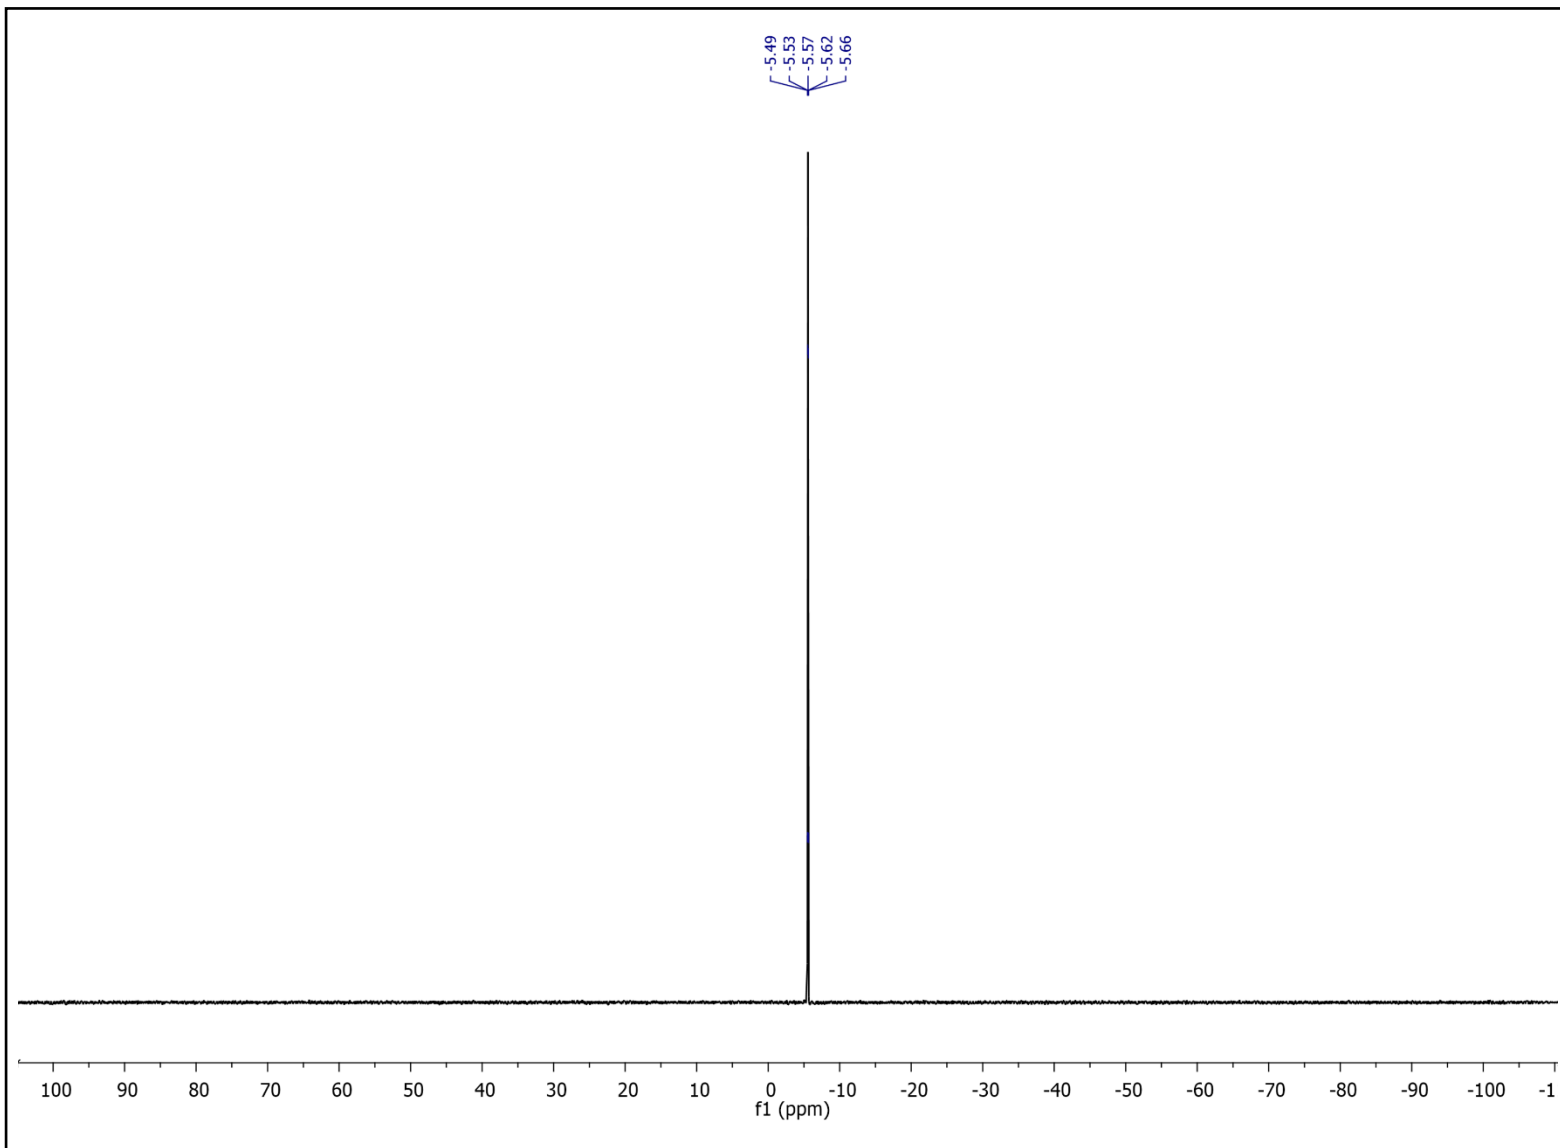

**S21**

# HRMS of compound 6

KT 619 126 (2.304) AM2 (Ar,20000.0,556.28,0.00,LS 3); Sm (SG, 3x1.00)

1: TOF MS ES+  
5.53e4

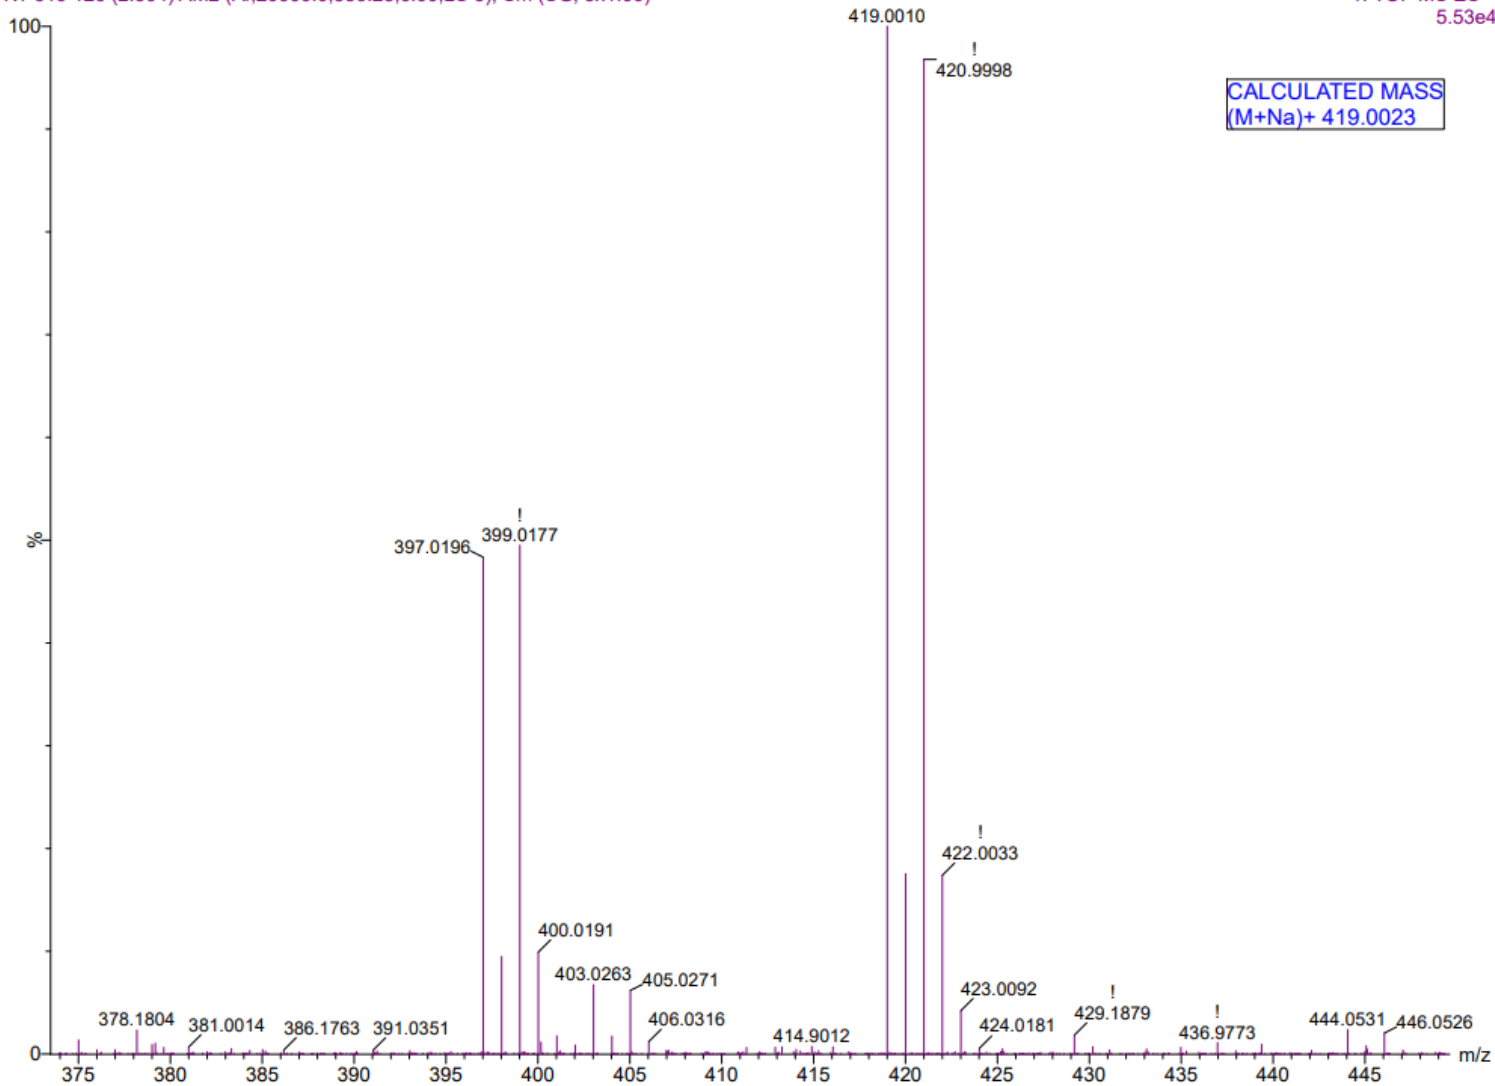

S22





<sup>13</sup>C NMR of compound 7 (DMSO-d<sub>6</sub>)

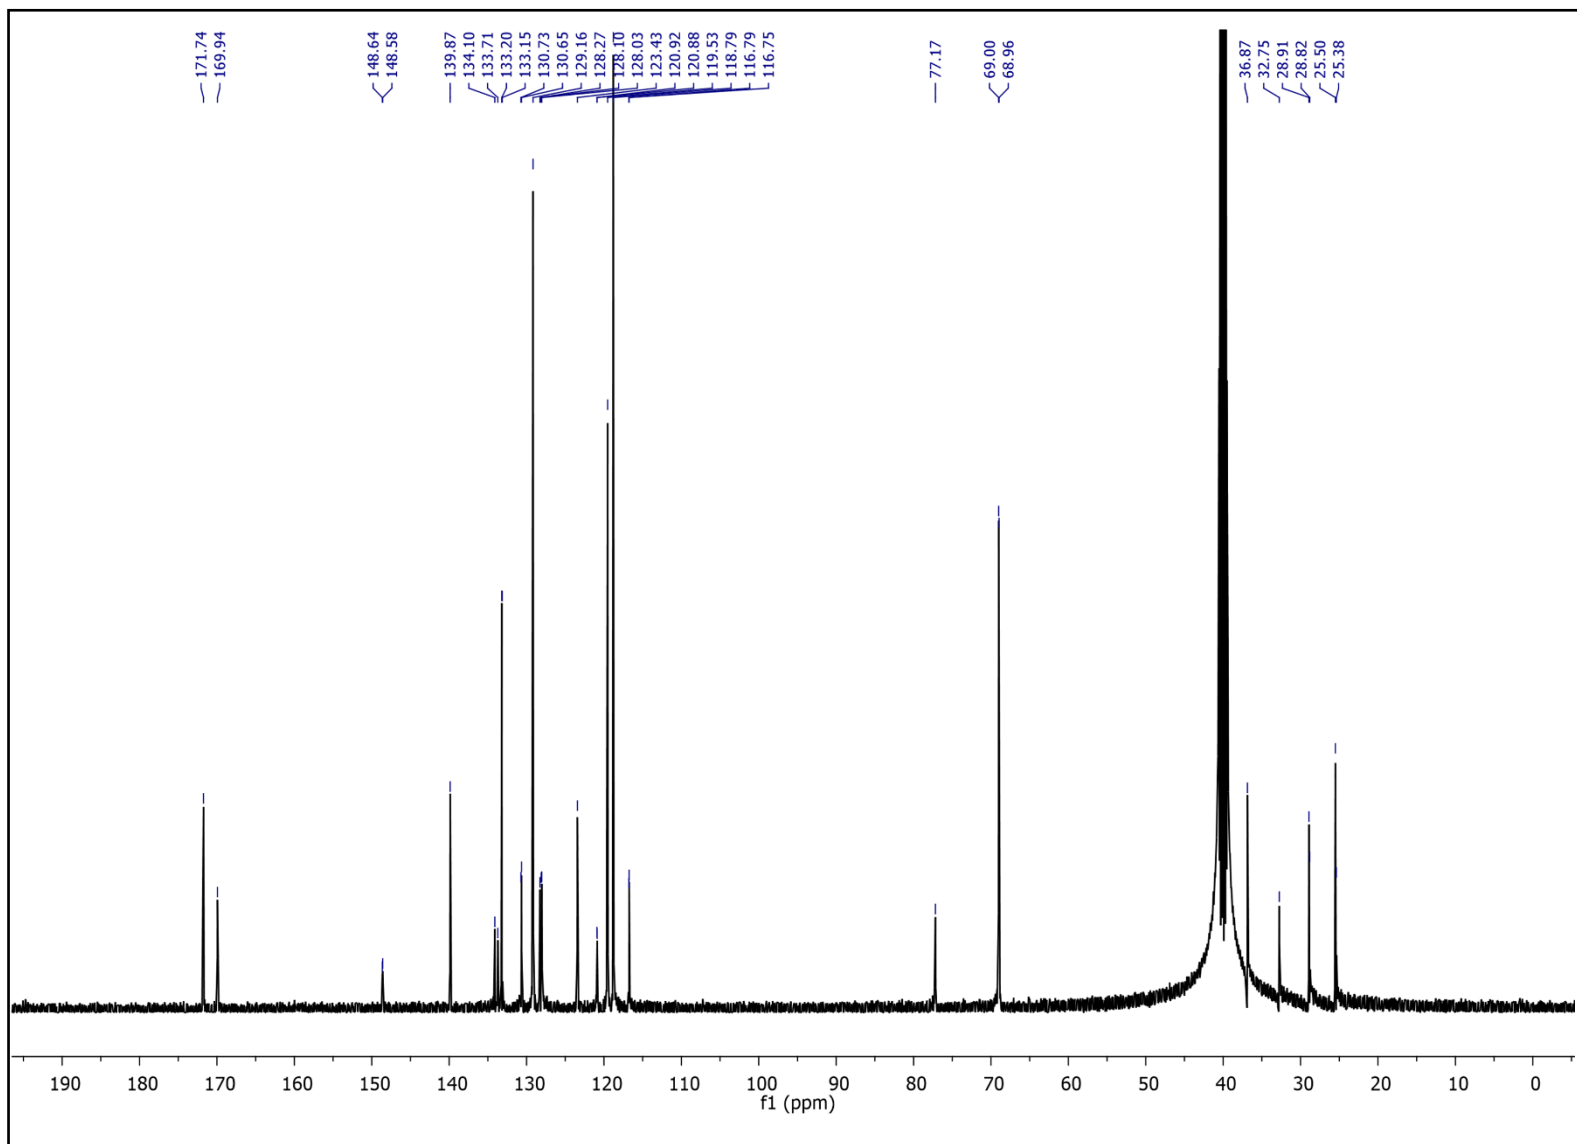

S24

**<sup>31</sup>P NMR of compound 7 (DMSO-d<sub>6</sub>)**

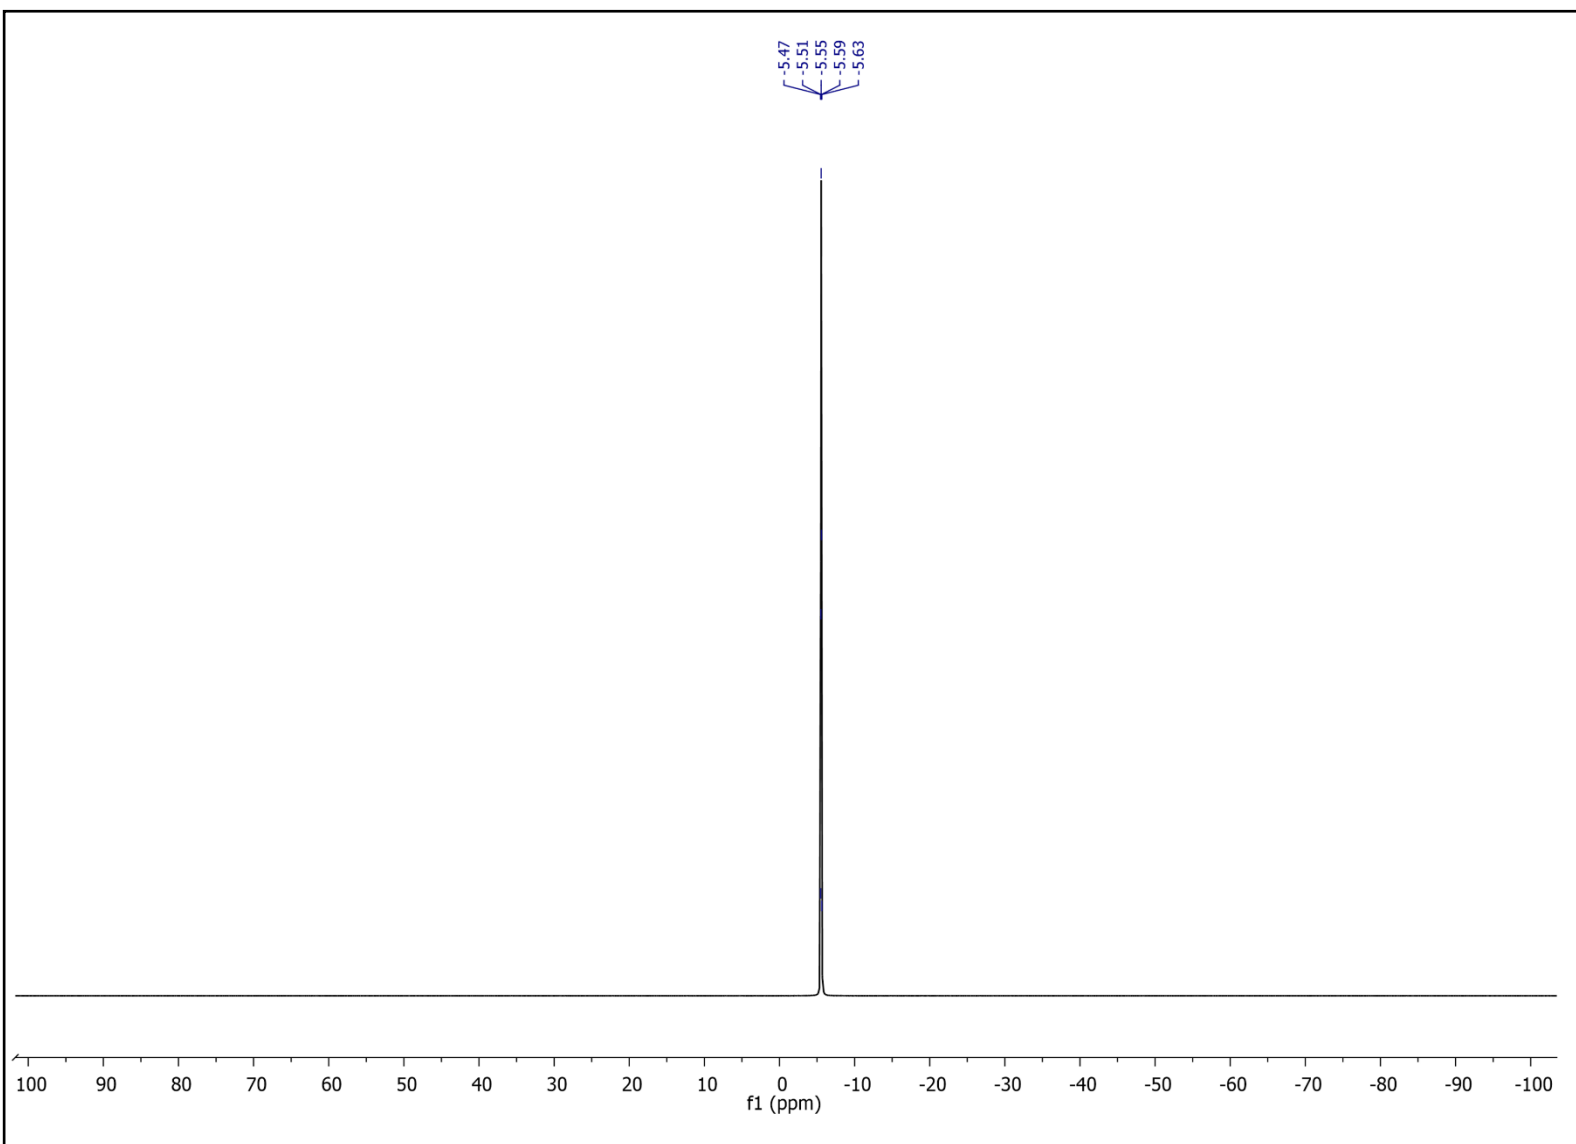

**S25**

# HRMS of compound 7

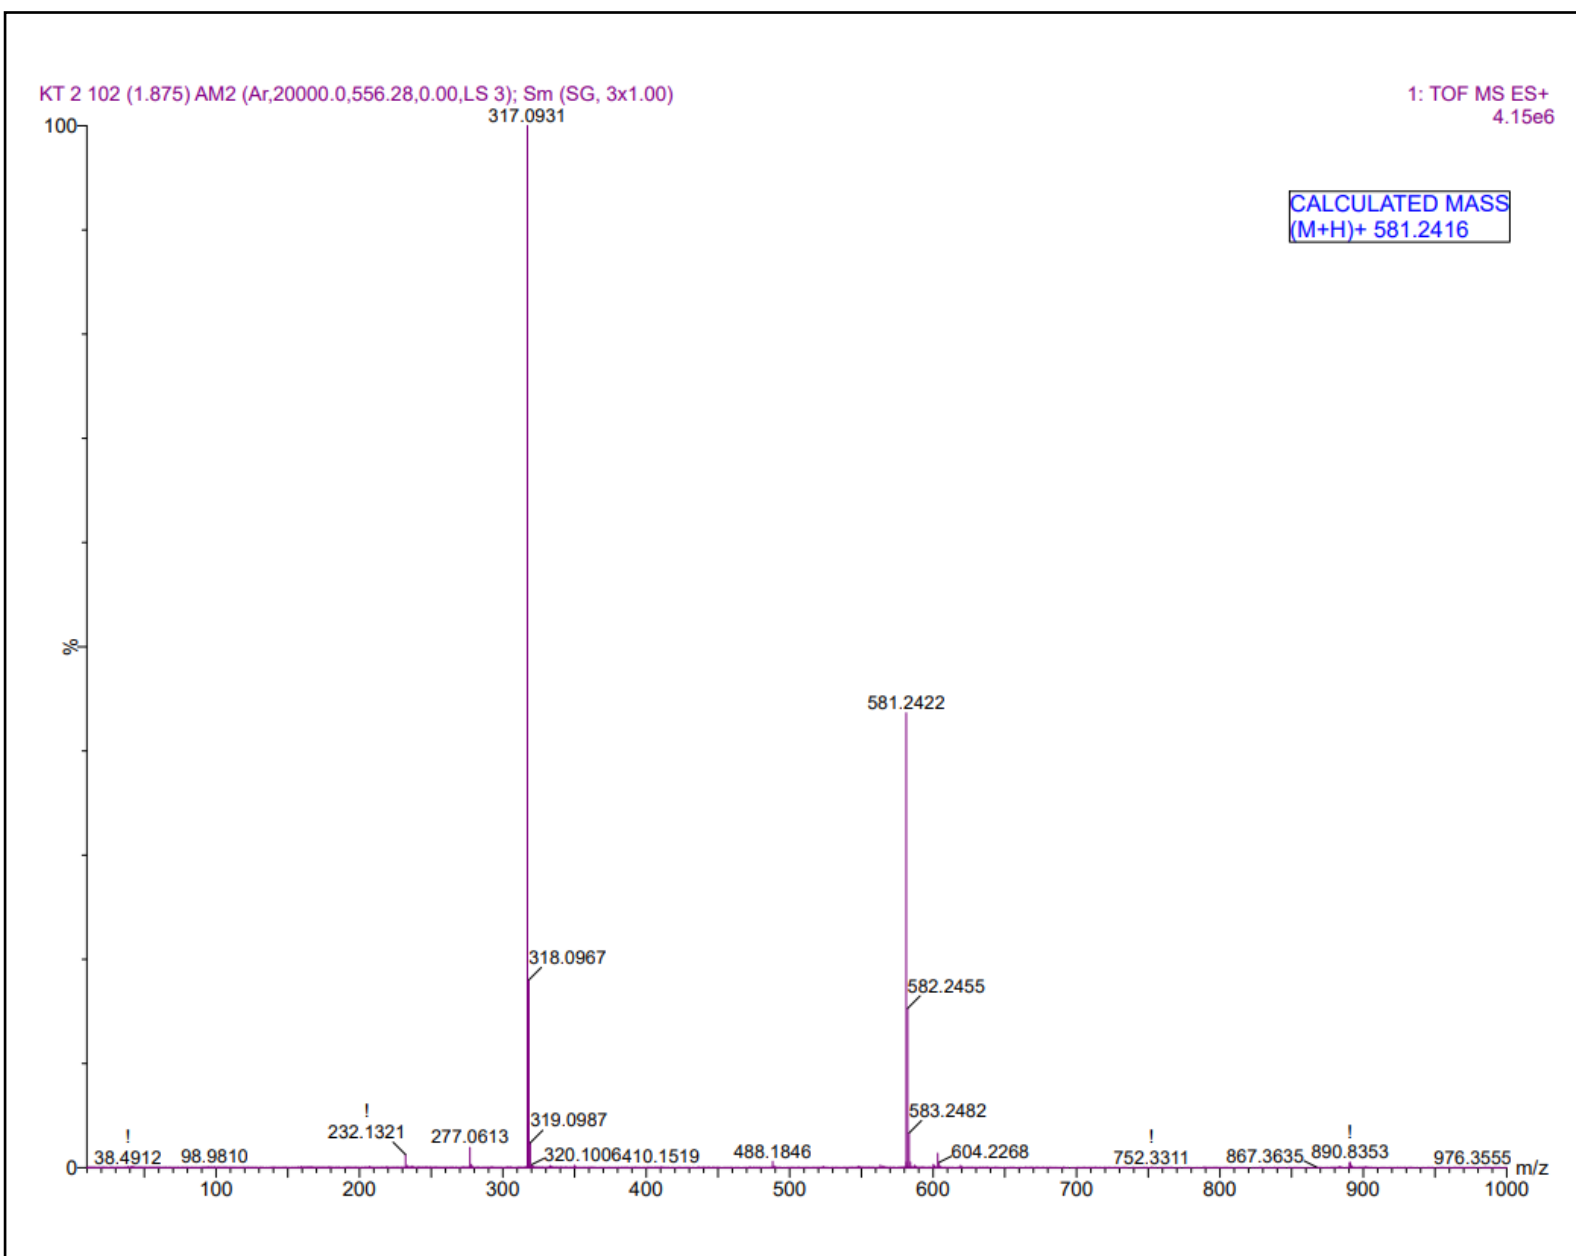

S26

<sup>1</sup>H NMR of compound 8 (DMSO-d<sub>6</sub>)

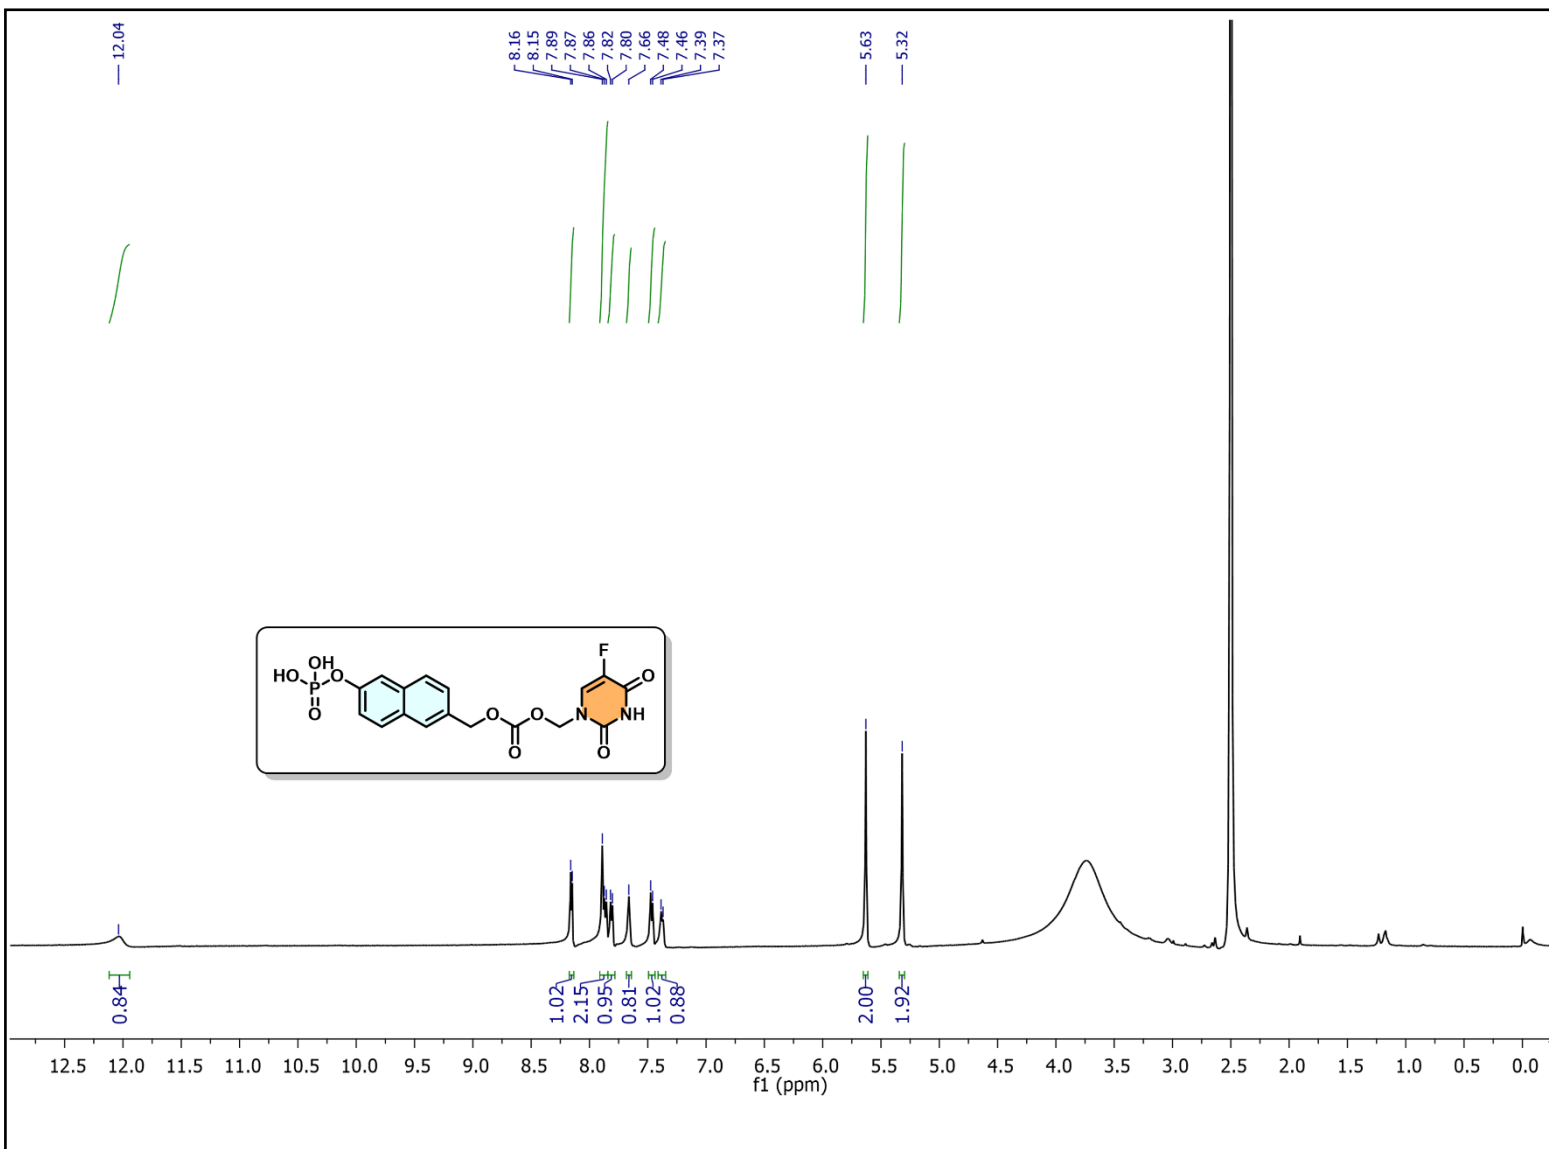

S27

**<sup>13</sup>C NMR of compound 8 (DMSO-d<sub>6</sub>)**

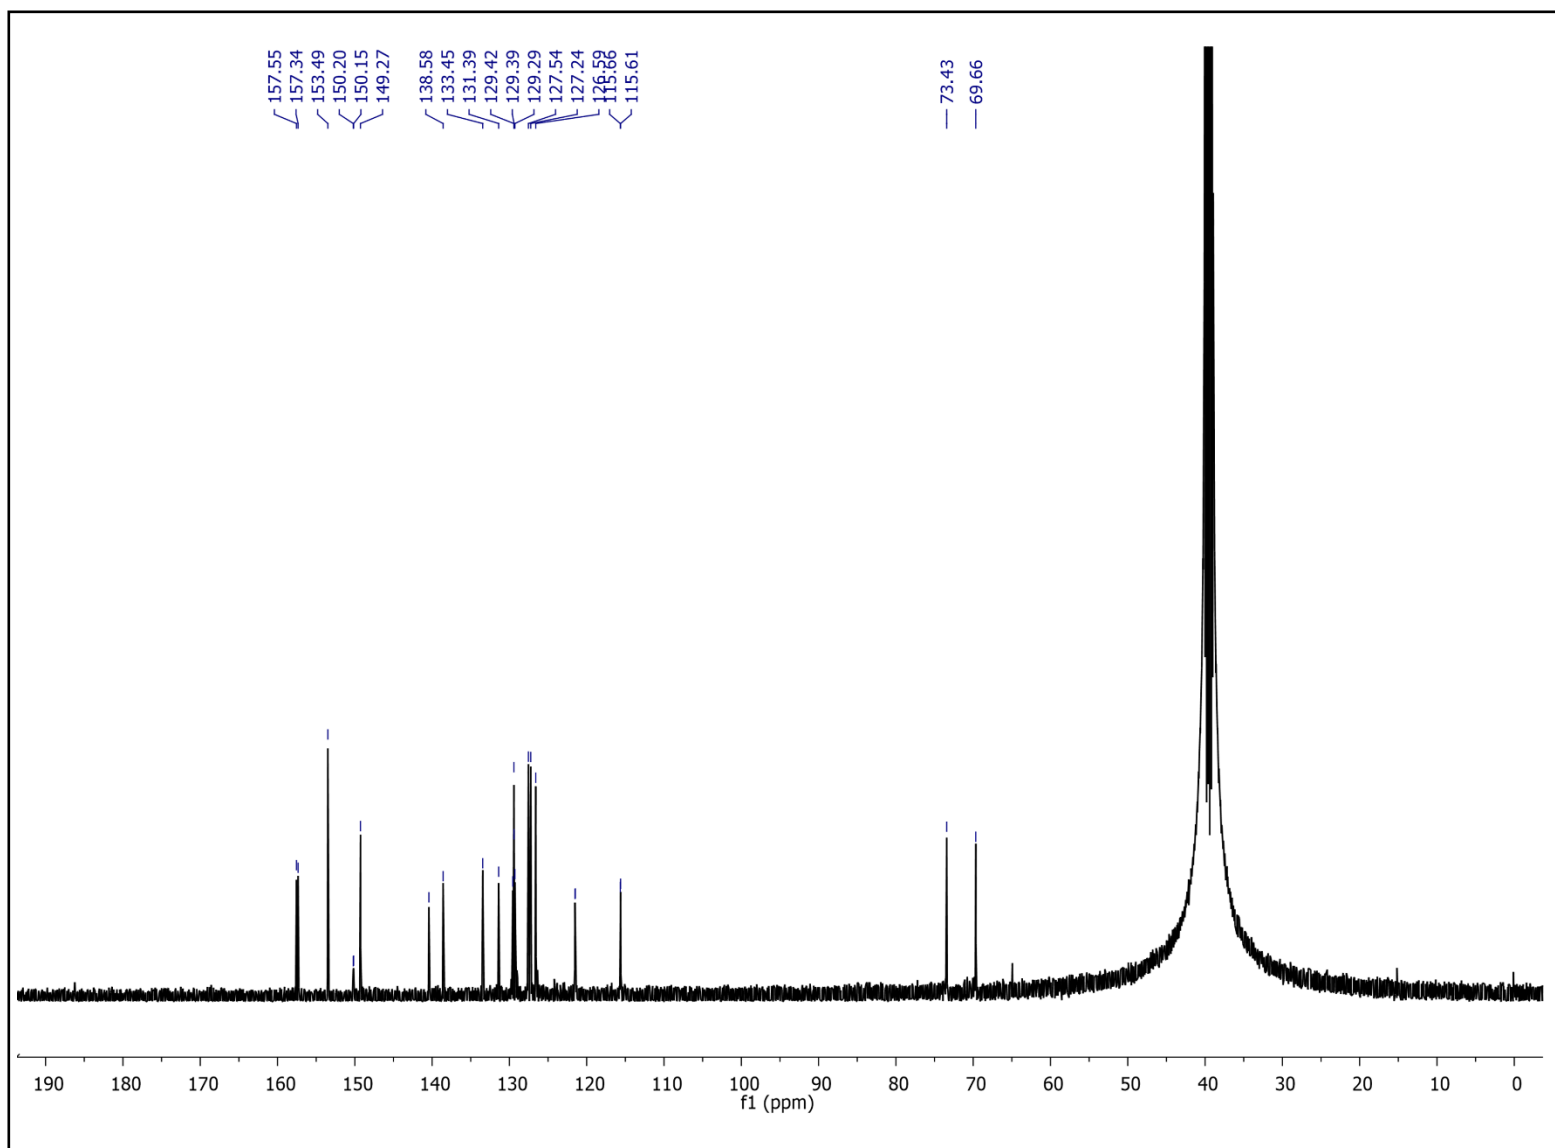

S28

**$^{31}\text{P}$  NMR of compound 8 (DMSO- $\text{d}_6$ )**

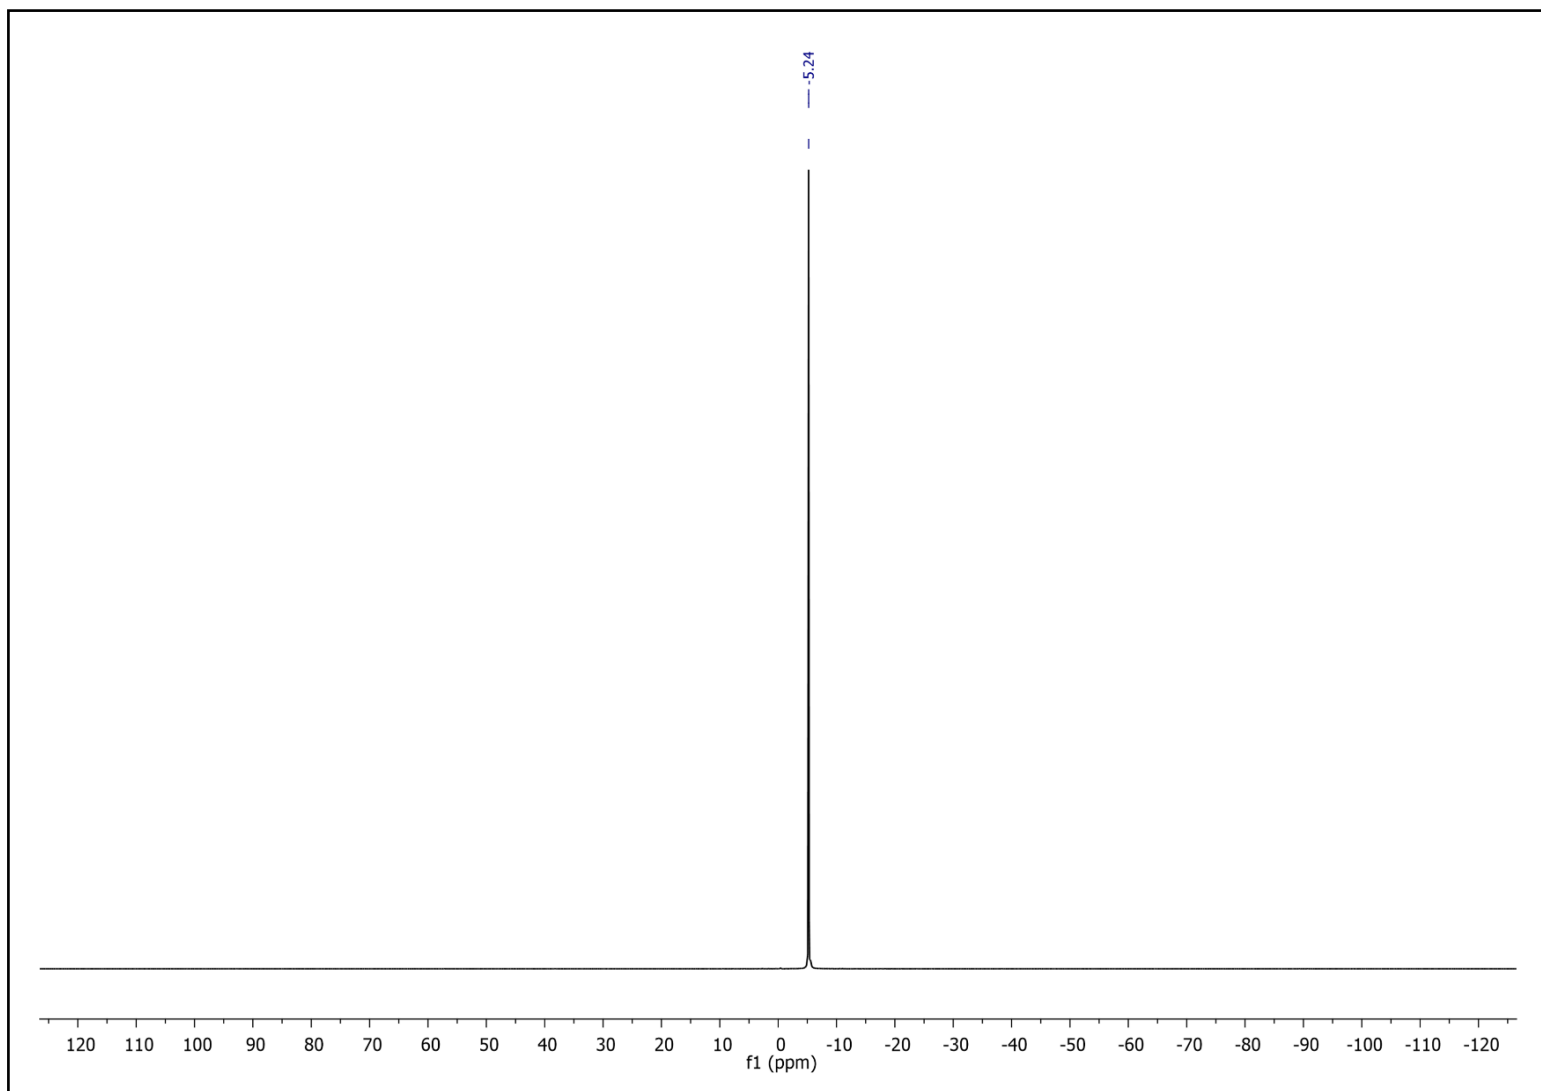

**S29**

**$^{19}\text{F}$  NMR of compound 8 (DMSO- $d_6$ )**

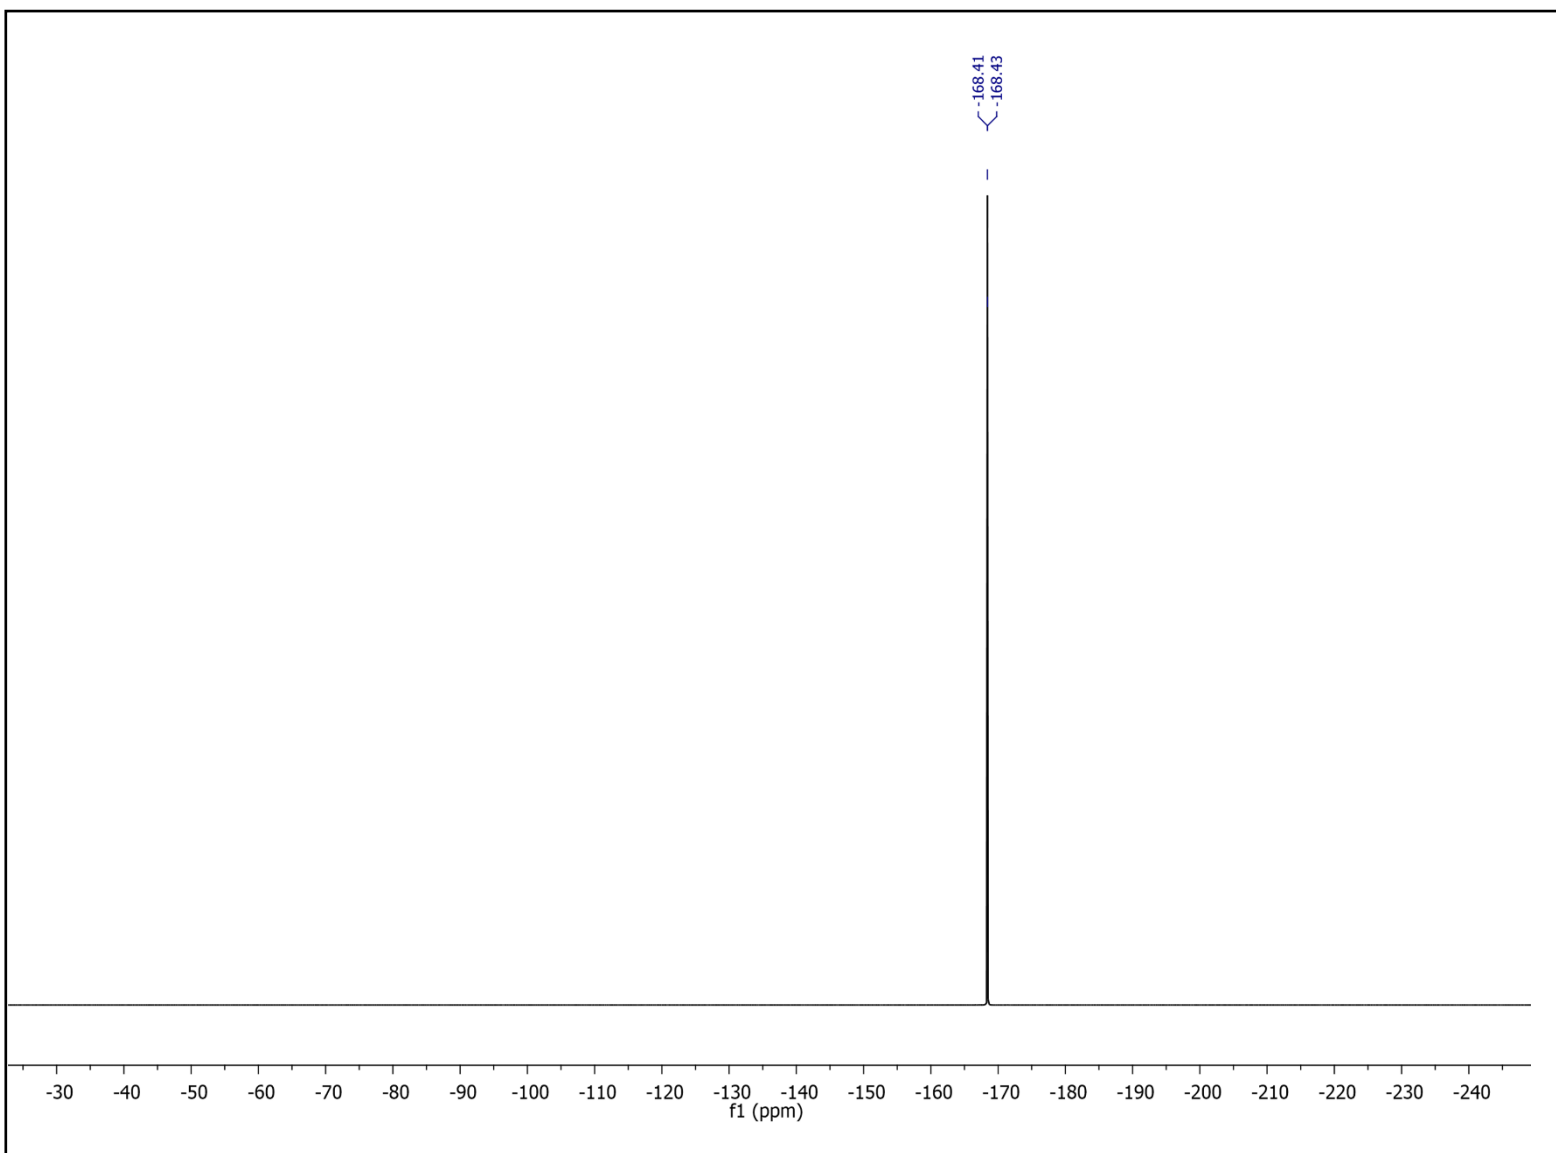

**S30**

## HRMS of compound 8

KT-02 #303 RT: 1.64 AV: 1 NL: 4.00E7  
T: FTMS - p ESI Full ms [100.0000-1500.0000]

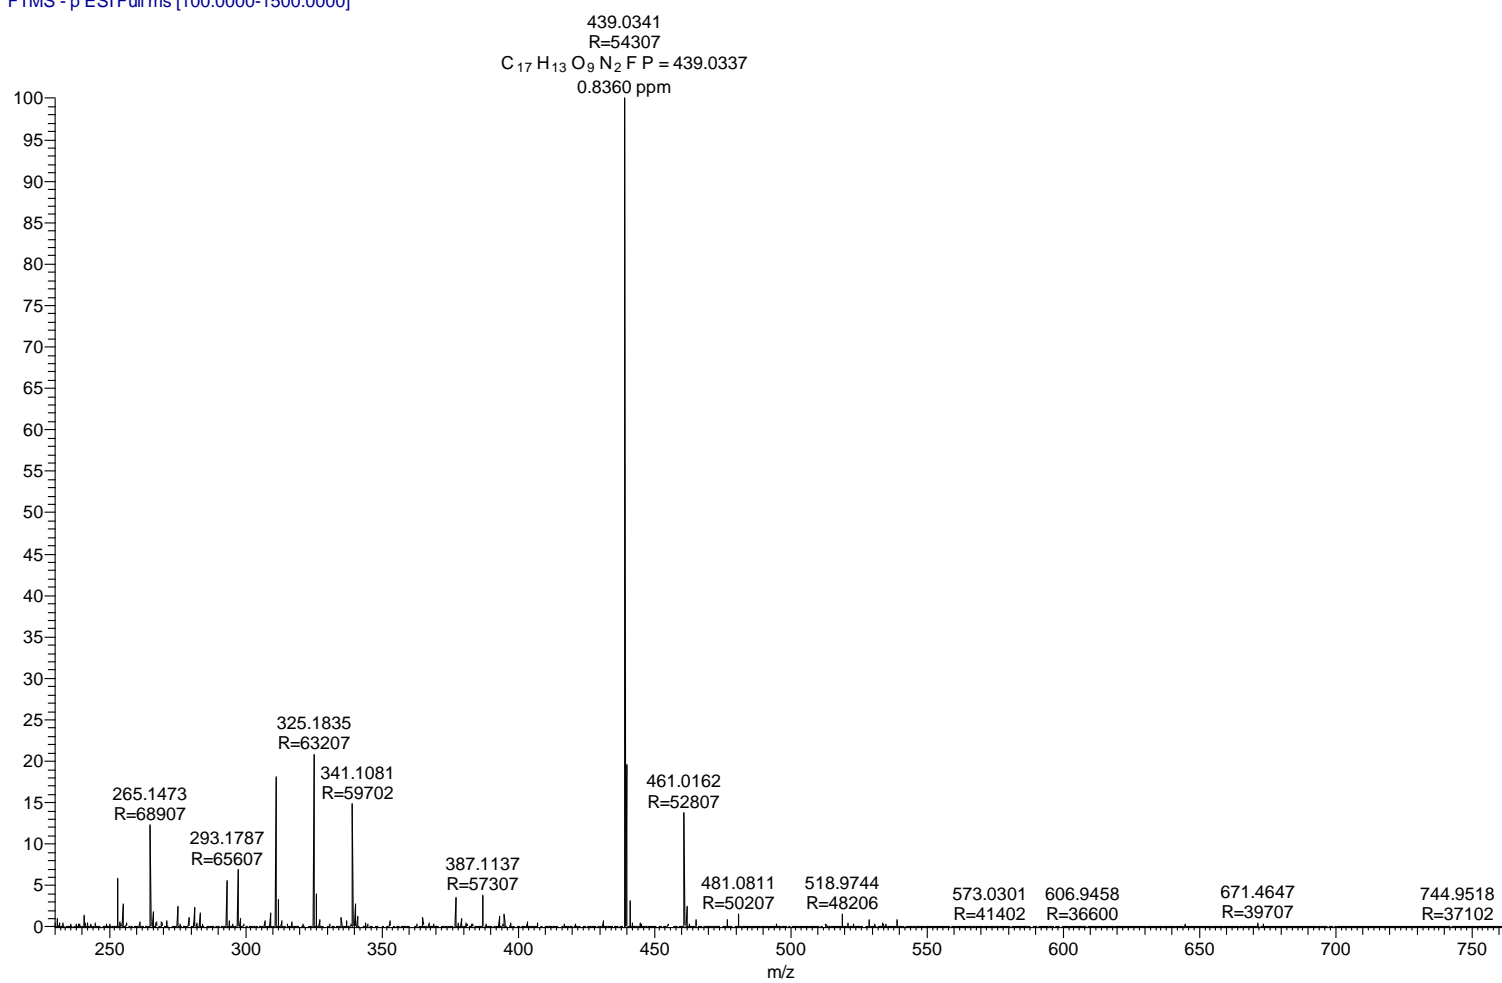

S31



<sup>1</sup>H NMR of compound 9 (DMSO-d<sub>6</sub>)

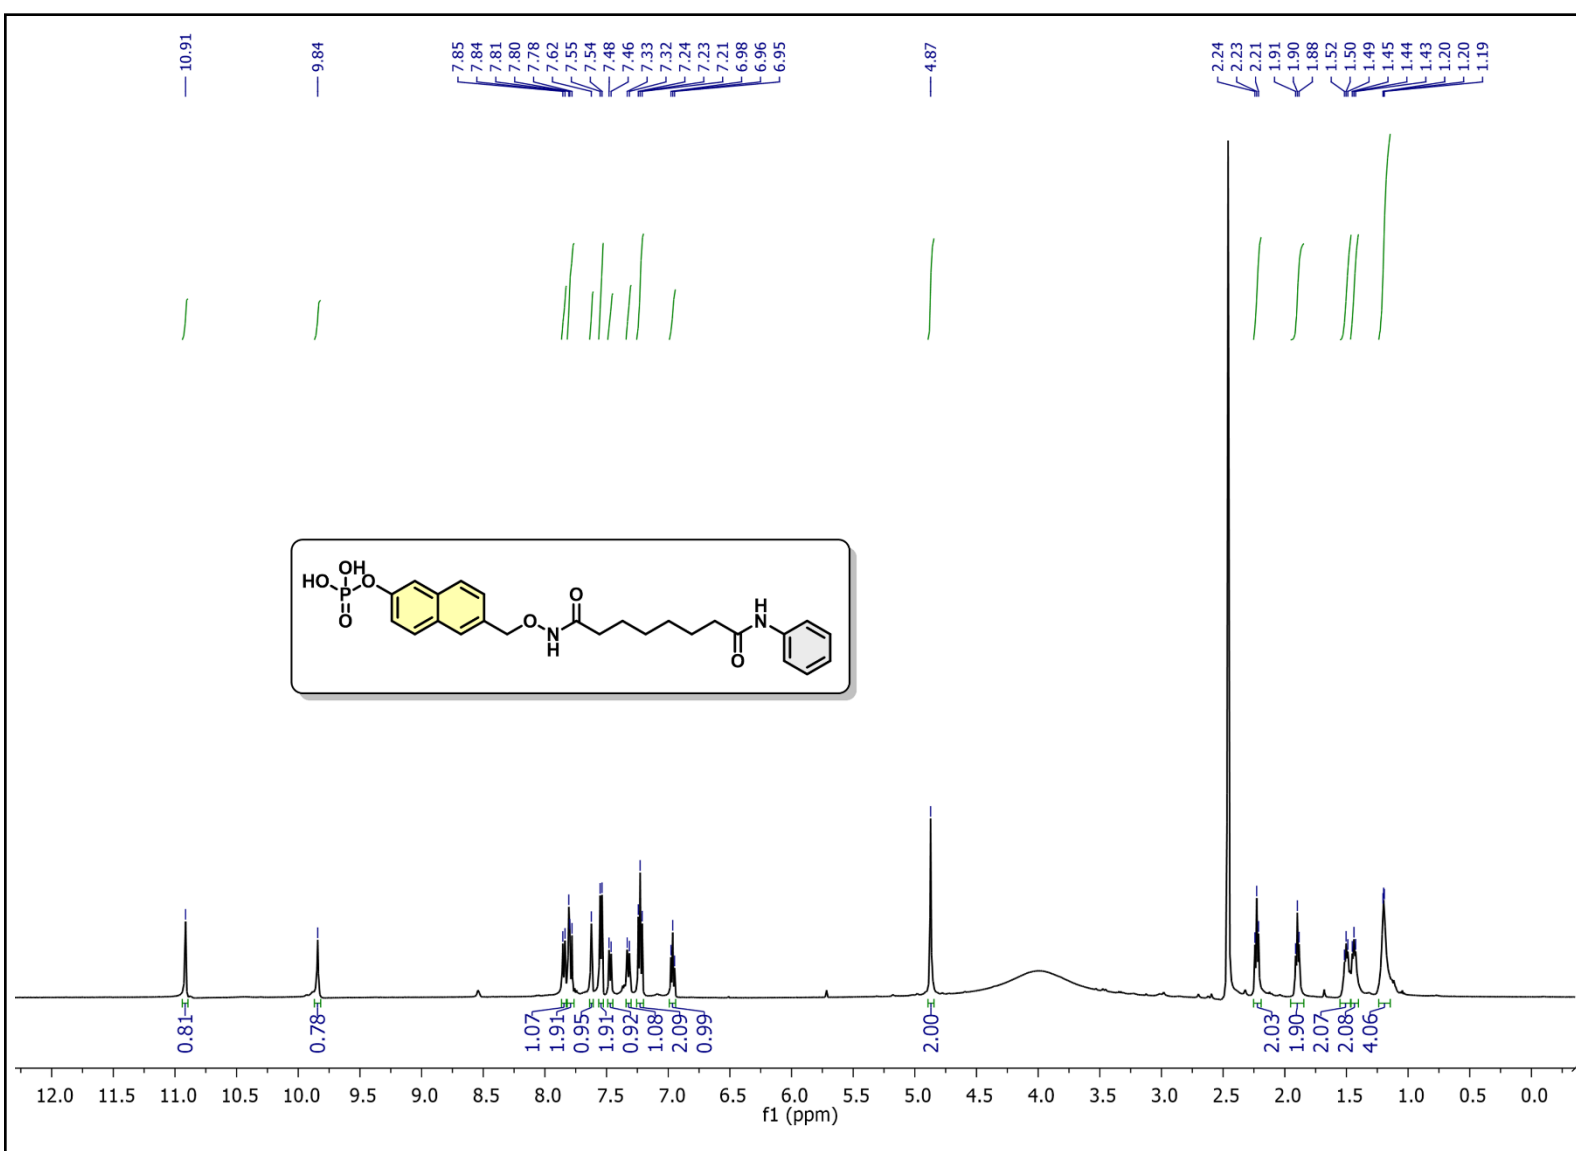

S32

<sup>13</sup>C NMR of compound 9 (DMSO-d<sub>6</sub>)

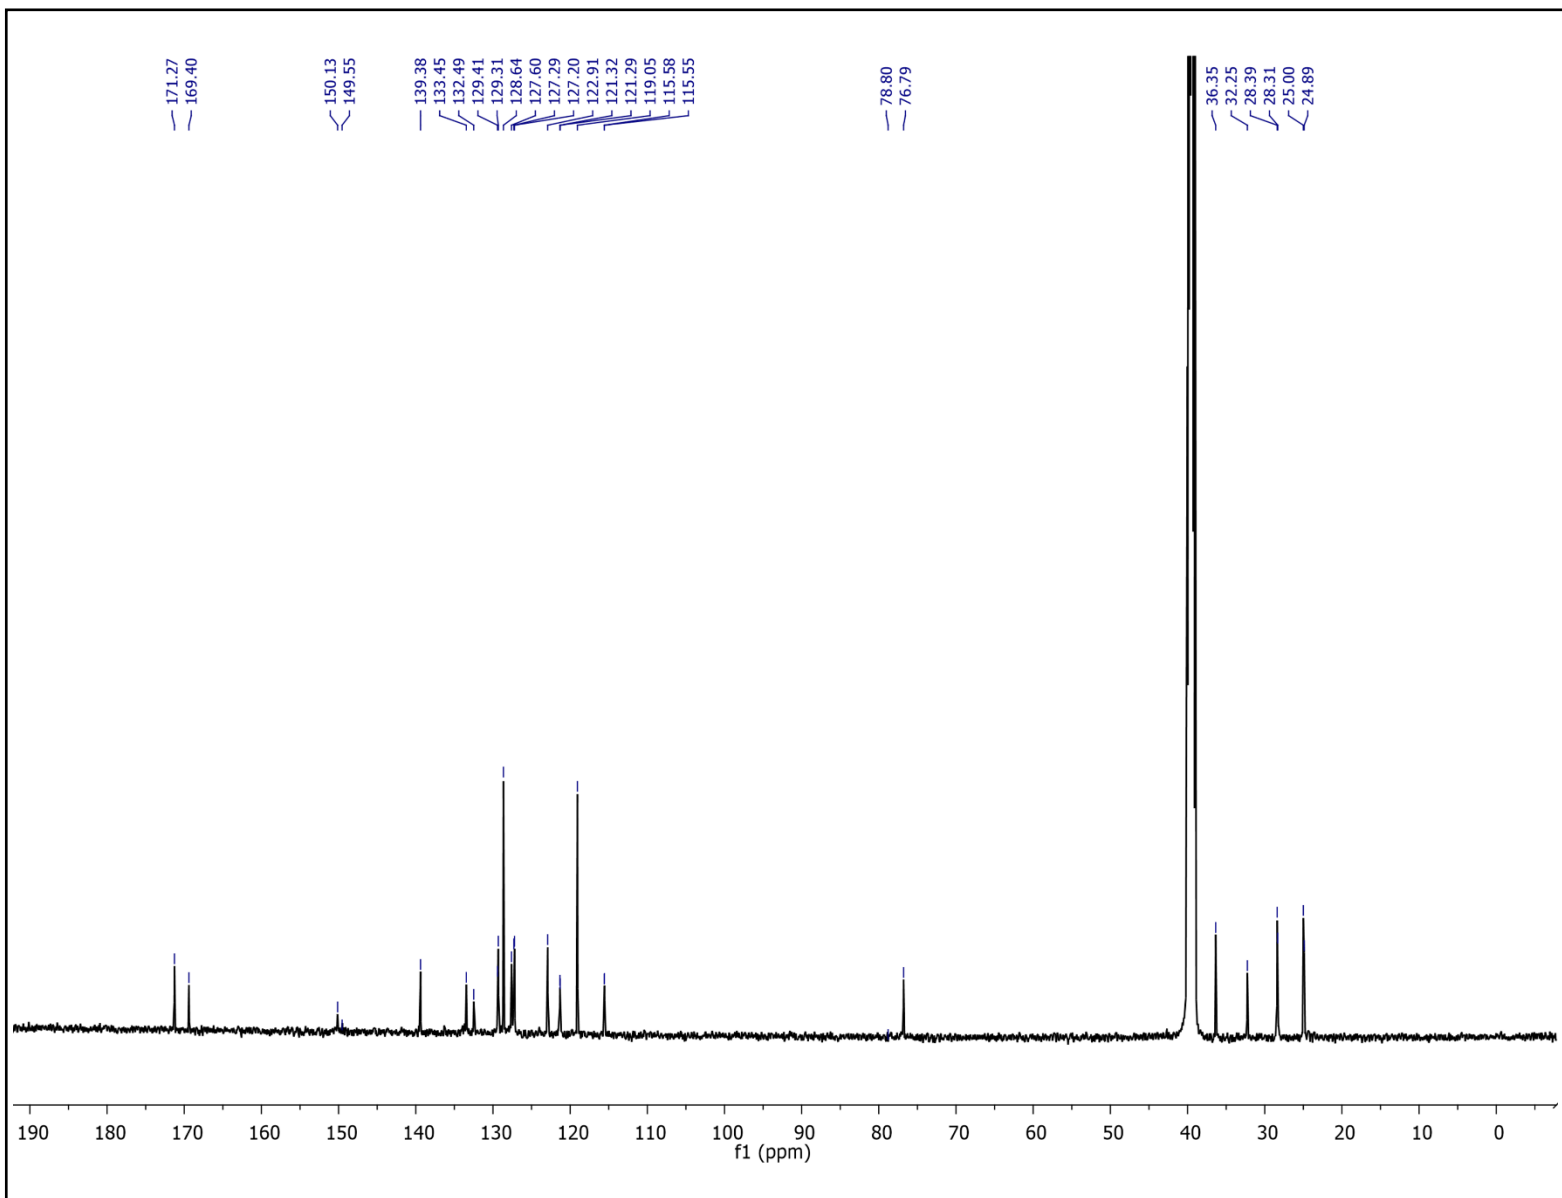

S33

**<sup>31</sup>P NMR of compound 9 (DMSO-d<sub>6</sub>)**

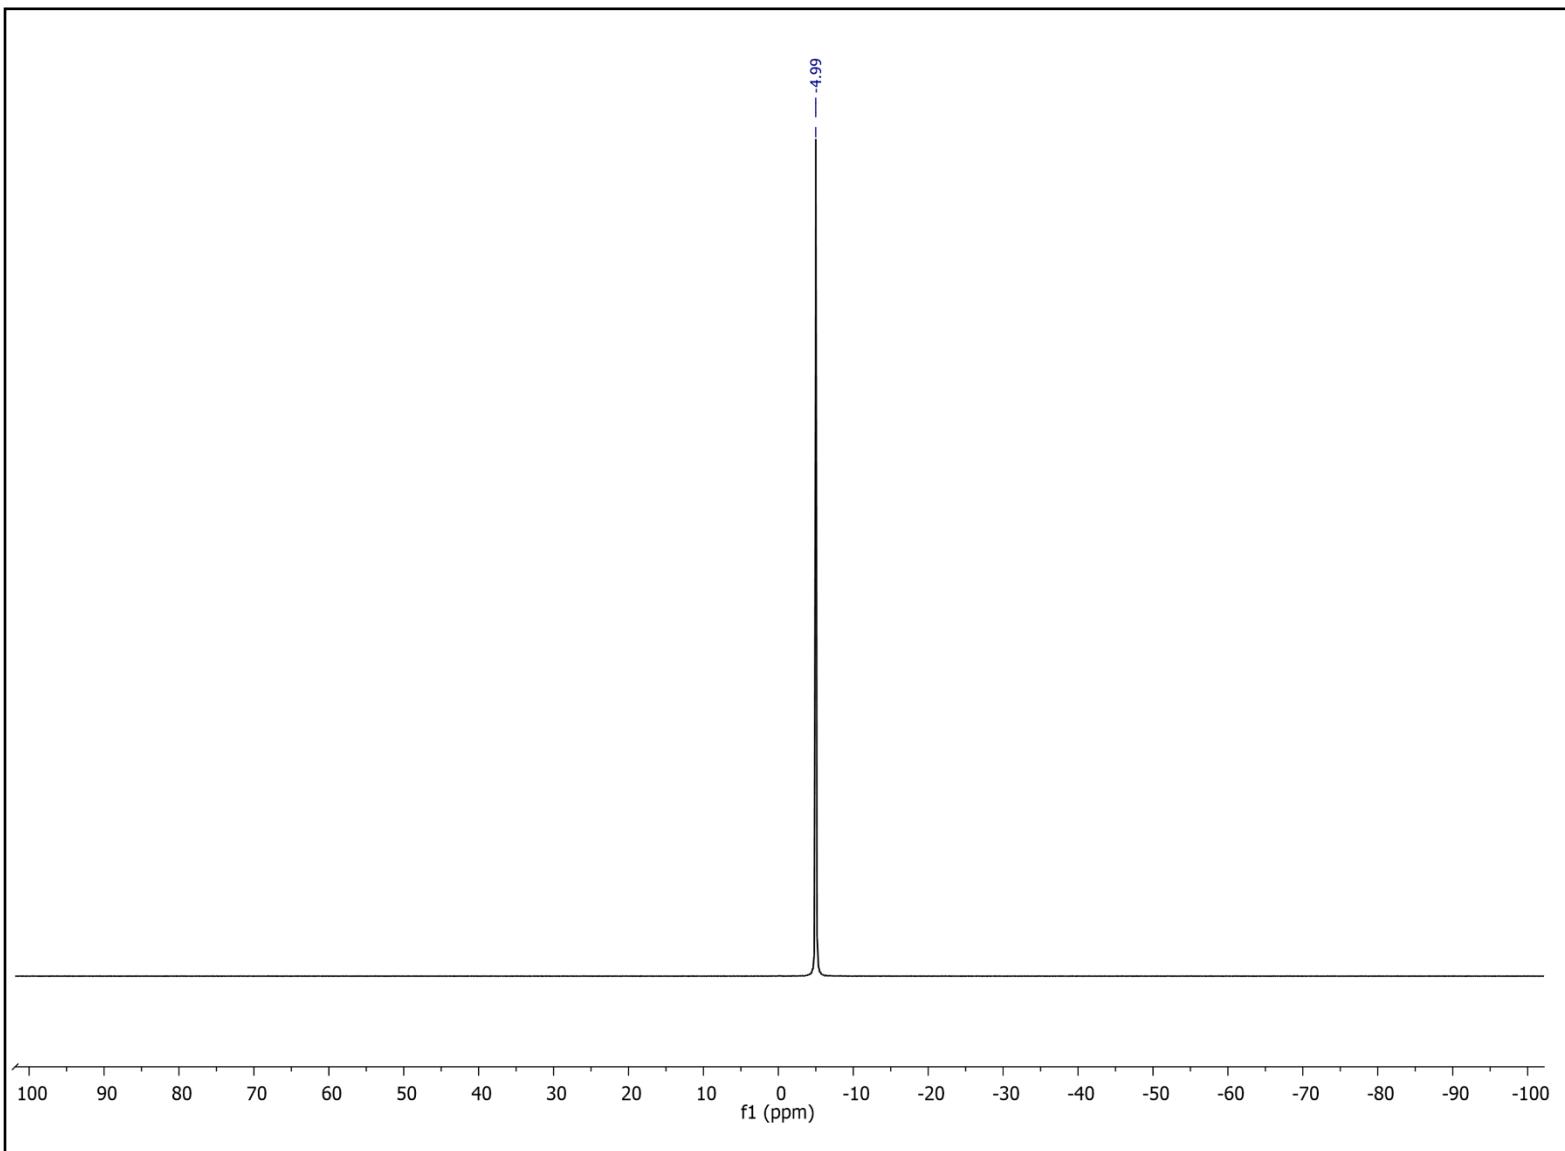

**S34**

# HRMS of compound 9

KT 3 58 (1.084) AM2 (Ar,20000.0,556.28,0.00,LS 3); Sm (SG, 3x1.00)

1: TOF MS ES+  
3.77e4

CALCULATED MASS  
(M+H)+ 501.1790

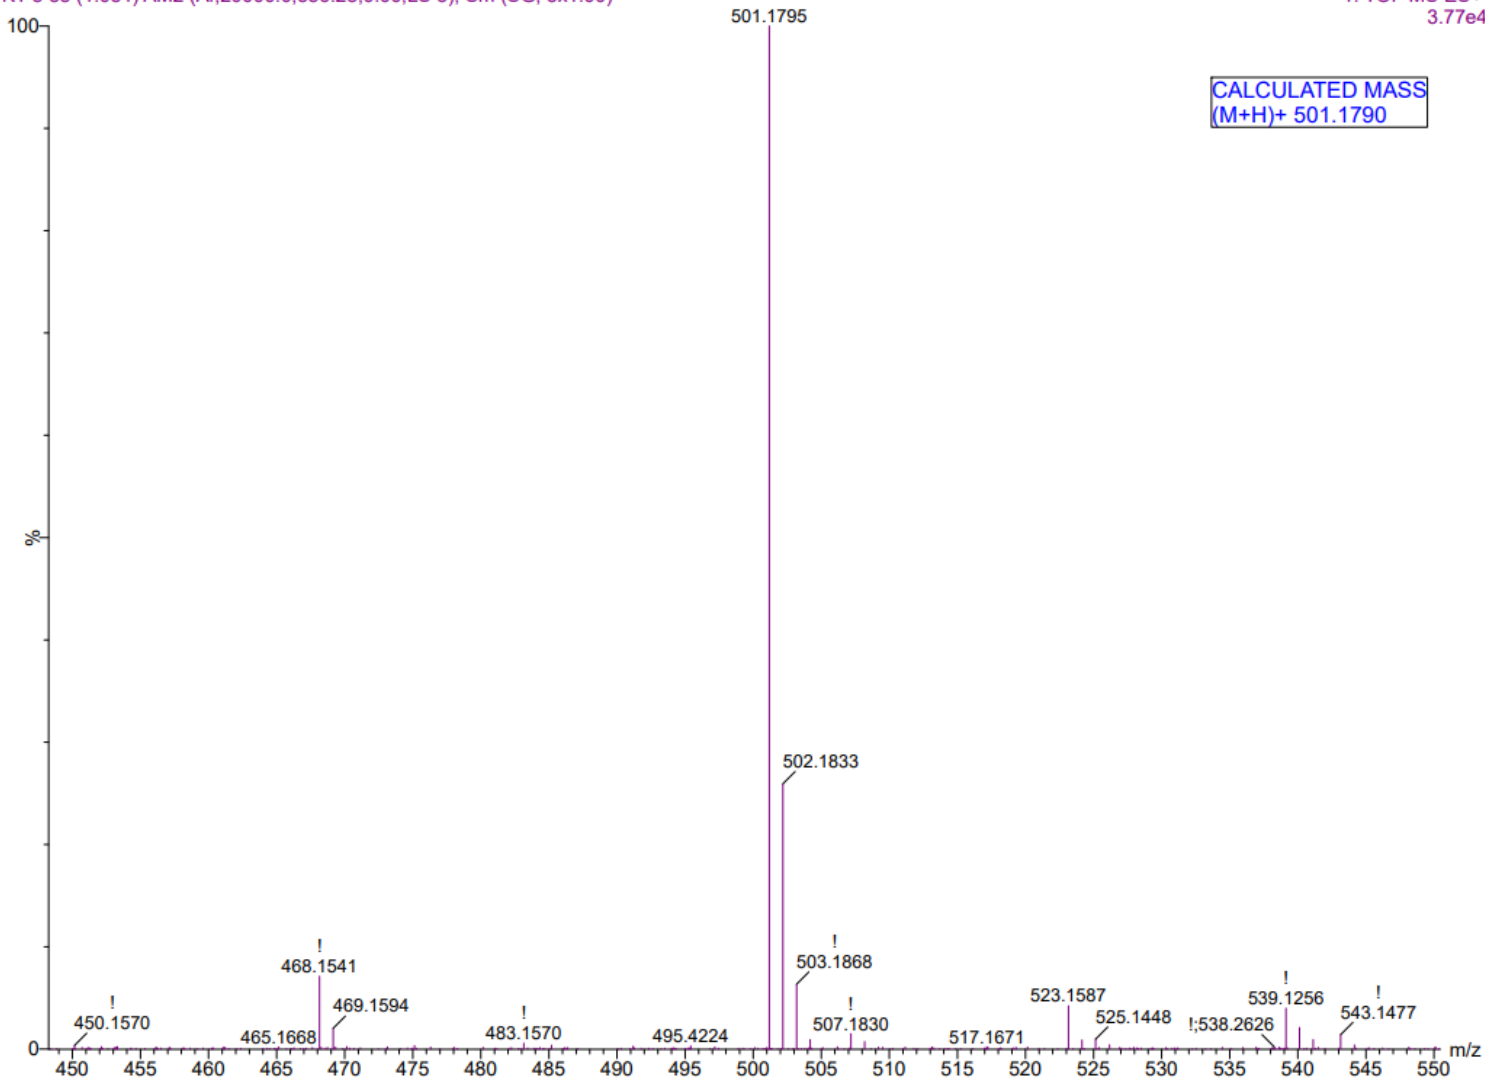

S35
